# Supplementary material for: Comprehensive mass analysis for chemical processes, a case study on l-Dopa manufacture
Source: Royal Society of Chemistry journal article supplement (doi:10.1039/c4gc00565a), 2014-01-01
Supplement: c4gc00565a1.pdf [file c4gc00565a1.pdf]

## **Comprehensive Mass Analysis of Commercial Processes for L-Dopa Manufacture**

Tao Li\* and Xuan Li†

National Risk Management Research Laboratory, Office of Research and Development, US  
Environmental Protection Agency, 26 W. Martin L. King Drive, Cincinnati, OH 45268-0001, USA.

\* Corresponding author, [li.tao@epa.gov](mailto:li.tao@epa.gov)

† Oak Ridge Institute for Science and Education (ORISE) Postdoctoral Research Associate

### **Supporting Information**

Page 2-3      The Sankyo Process

Page 4-25     The Hoffman La-Roche Process

Page 26 – 41   The Monsanto Process

Page 42 – 54   The Ajinomoto Process

Page 55-59    Waste Stream Inventories for L-Dopa Manufacture Processes

## The Sankyo Process

### Reaction 1

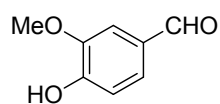

$C_8H_8O_3$  152  
**5**

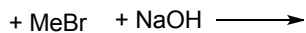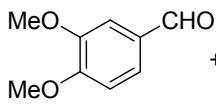

$C_9H_{10}O_3$  166  
**20**

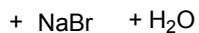

Input Output

287 287

CH<sub>3</sub>Br 95 HNaO, 40

BrNa 103 H<sub>2</sub>O 18

### Reaction 2

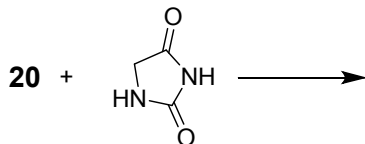

$C_3H_4N_2O_2$  100  
**21**

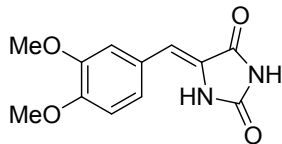

$C_{12}H_{12}N_2O_4$  248  
**22**

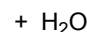

266 266

H<sub>2</sub>O 18

### Reaction 3

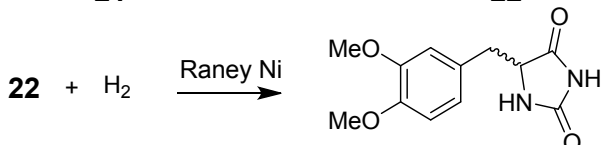

H<sub>2</sub> 2

**23**  $C_{12}H_{14}N_2O_4$  250

250 250

### Reaction 4

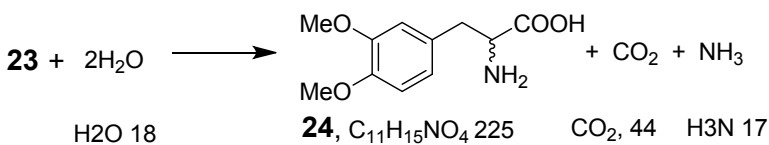

H<sub>2</sub>O 18

**24**,  $C_{11}H_{15}NO_4$  225 CO<sub>2</sub>, 44 H<sub>3</sub>N 17

286 286

### Reaction 5

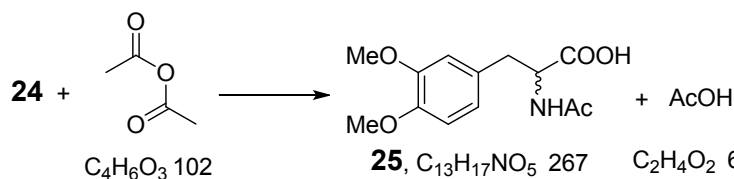

$C_4H_6O_3$  102

**25**,  $C_{13}H_{17}NO_5$  267  $C_2H_4O_2$  60

327 327

### Reaction 6

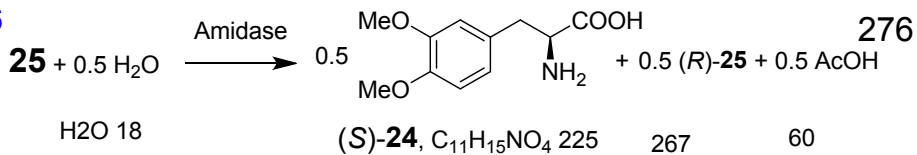

H<sub>2</sub>O 18

(S)-**24**,  $C_{11}H_{15}NO_4$  225 267 60

276 276

### Reaction 7

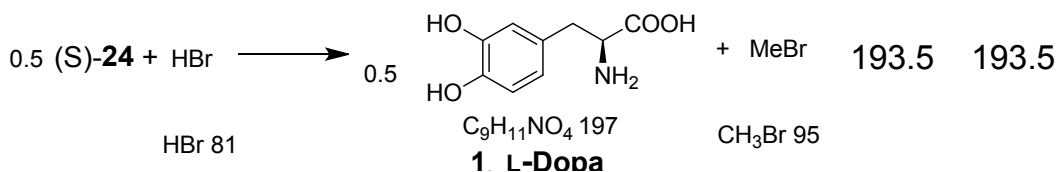

HBr 81

$C_9H_{11}NO_4$  197  
**1 L-Dopa**

CH<sub>3</sub>Br 95

193.5 193.5

| Reaction     | Input             | Output                 | Mw  | Equivalent | Mass      |
|--------------|-------------------|------------------------|-----|------------|-----------|
| 1            | <b>5</b>          |                        | 152 | 1          | 152       |
|              | MeBr              |                        | 95  | 1          | 95        |
|              | NaOH              |                        | 40  | 1          | 40        |
|              |                   | <b>20</b>              | 166 | 1          |           |
| 2            | <b>21</b>         |                        | 100 | 1          | 100       |
|              |                   | <b>22</b>              | 248 | 1          |           |
| 3            | H <sub>2</sub>    |                        | 2   | 1          | 2         |
|              |                   | <b>23</b>              | 250 | 1          |           |
| 4            | H <sub>2</sub> O  |                        | 18  | 2          | 36        |
|              |                   | <b>24</b>              | 225 | 1          |           |
| 5            | Ac <sub>2</sub> O |                        | 102 | 1          | 102       |
|              |                   | <b>25</b>              | 267 | 1          |           |
| 6            | H <sub>2</sub> O  |                        | 18  | 0.5        | 9         |
|              |                   | <i>(S)</i> - <b>24</b> | 225 | 0.5        |           |
| 7            | HBr               |                        | 81  | 1          | 162       |
|              |                   | <b>L-Dopa</b>          | 197 | 0.5        | <b>99</b> |
| Total input  |                   |                        |     |            | 698       |
| Atom economy | 0.141             |                        |     |            |           |

## The Hoffman La-Roche Process

### Reaction 1

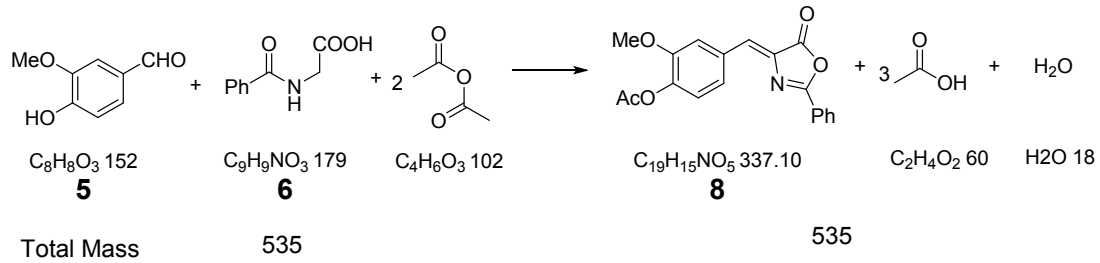

### Reaction 2

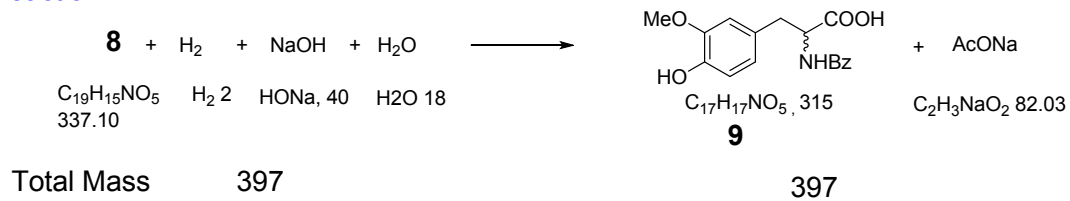

### Reaction 3

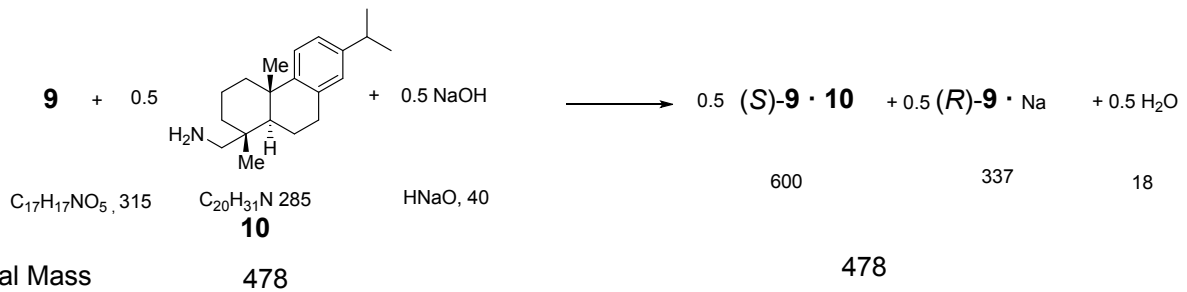

### Reaction 4

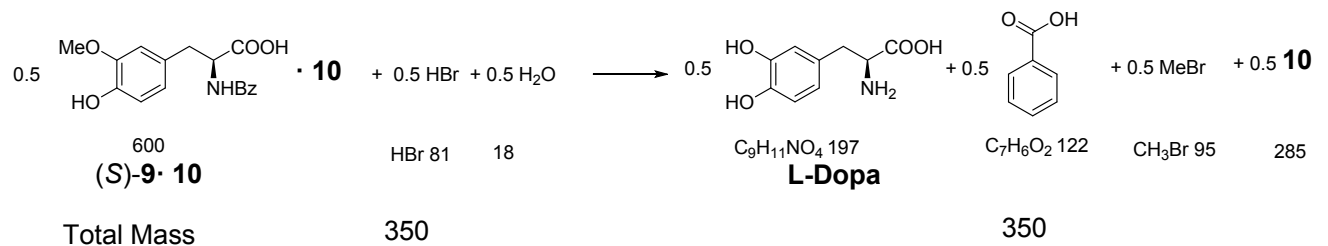

## Atom economy

| Reaction     | Input             | Output     | Mw  | Equivalent | Mass |
|--------------|-------------------|------------|-----|------------|------|
| 1            | 5                 |            | 152 | 1          | 152  |
|              | 6                 |            | 179 | 1          | 179  |
|              | Ac <sub>2</sub> O |            | 102 | 2          | 204  |
|              |                   | 8          | 337 | 1          |      |
| 2            | H <sub>2</sub>    |            | 2   | 1          | 2    |
|              | NaOH              |            | 40  | 1          | 40   |
|              | H <sub>2</sub> O  |            | 18  | 1          | 18   |
|              |                   | 9          | 315 | 1          |      |
| 3            | 10                |            | 285 | 0.5        | 143  |
|              | NaOH              |            | 40  | 0.5        | 20   |
|              |                   | (S)-9 • 10 | 600 | 0.5        |      |
| 4            | HBr               |            | 81  | 0.5        | 41   |
|              | H <sub>2</sub> O  |            | 18  | 0.5        | 9    |
|              |                   | L-Dopa     | 197 | 0.5        | 99   |
| Total input  |                   |            |     |            | 808  |
| Atom economy | 0.123             |            |     |            |      |

## Lab protocol for the Hofmann La-Roche Process<sup>1</sup>

### Outline:

- D,L-N-Benzoyl-3-(4)-(o-acetyl-vanillylidene)-2-oxazoline-5-one (**8**) is prepared by Erlenmeyer reaction with vanillin and hippuric acid.
- The product is then reduced by hydrogenation under basic condition to give D,L-N-benzoyl-3-(4-hydroxy-3-methoxyphenyl)-alanine (**9**).
- The D, L-N-benzoyl-3-(4-hydroxy-3-methoxyphenyl)-alanine is resolved by classical resolution by forming salt with dehydroabietylamine ((S)-**9** and **10**).
- In the last step, the salt is decomposed and (S)-**9** is deprotected in aqueous HBr to give L-Dopa as the final product.
- The D-enantiomer of N-benzoyl-3-(4-hydroxy-3-methoxyphenyl)-alanine can be recycled by racemization.
- MeBr is decomposed by reacting with ethanolamine in a scrubber.

## Step 1

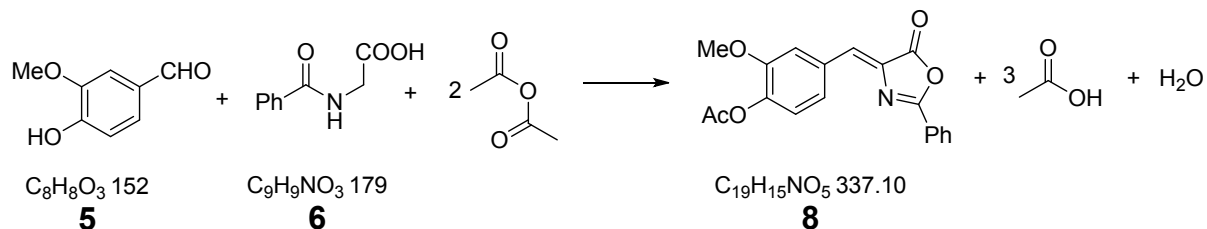

- Mix 76 g of vanillin, 89.5 g of hippuric acid **6** and 75 g of sodium acetate with 150 ml of acetic anhydride and 25 ml of DMF. The mixture is heated to 100 °C for 30 min. When reaction completes, cool the mixture to ambient temperature, then add 700 ml of water over 15 min to crystallize the product. Chill the solution to 0 °C and continue the crystallization for 4 h. The product is isolated by filtration.
- The solid is washed by 408 ml (3X of product) of water twice. After drying, 136 g of product **8** is isolated (80% yield).

| Input                   |          |                |            |            |      |                 |               |      |
|-------------------------|----------|----------------|------------|------------|------|-----------------|---------------|------|
| Chemical                | Vol (ml) | Density (g/ml) | Weight (g) | Mw (g/mol) | mol  | Role            | X/ref 1 (g/g) | PMI  |
| Vanillin <b>5</b>       |          |                | 76         | 152        | 0.50 | Reference 1     | 1.00          | 4.0  |
| Hippuric acid <b>6</b>  |          |                | 89.5       | 179        | 0.50 | reactant        | 1.18          | 4.8  |
| Acetic anhydride        | 150      | 1.08           | 162        | 102        | 1.59 | reactant        | 2.13          | 8.6  |
| Sodium acetate          |          |                | 75         | 82         | 0.91 | catalyst        | 0.99          | 4.0  |
| DMF                     | 25       | 0.944          | 23.6       |            |      | Solvent         | 0.31          | 1.3  |
| Total input             |          |                | 426.1      |            |      |                 | 5.61          | 22.6 |
| Theoretical Output      |          |                |            |            |      |                 |               |      |
| <b>Expected product</b> |          |                |            |            |      |                 |               |      |
| Compound <b>8</b>       |          |                | 168.50     | 337        | 0.50 | Product         | 2.22          |      |
| Acetic acid             |          |                | 90.00      | 60         | 1.50 | by product      | 1.18          |      |
| Water                   |          |                | 9.00       | 18         | 0.50 | by product      | 0.12          |      |
| <b>Solvent, excess</b>  |          |                |            |            |      |                 |               |      |
| Acetic anhydride        |          | 1.08           | 60.00      | 102        | 0.59 | excess reactant | 0.79          |      |
| Sodium acetate          |          |                | 75.00      | 82         | 0.91 | catalyst        | 0.99          |      |
| DMF                     |          | 0.944          | 23.6       |            |      | solvent         | 0.31          |      |
| Total output            |          |                | 426.10     |            |      |                 | 5.61          |      |
| Work up & isolation     |          |                |            |            |      |                 |               |      |
| Water                   | 700      | 1              | 700        |            |      | Anti-solvent    | 9.21          | 37.1 |
| water                   | 816      | 1              | 816        |            |      | Rinse           | 10.7          | 43.2 |
| Total Mass              |          |                | 1516       |            |      |                 | 19.9          | 80.3 |
| Actual yield: 80%       |          |                |            |            |      |                 |               |      |
| Compound <b>8</b>       |          |                | 136        | 337        | 0.40 | Product         | 1.79          | 7.20 |
| $RF_1$                  |          | 0.5638         |            | $CRF_1$    |      |                 | 4.024         |      |

## Step 2

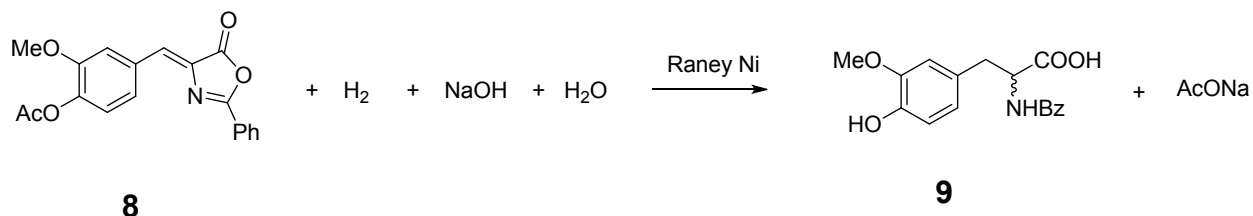

1. Mix 280 g of **8** with 6000 g water. Add 250 g of NaOH and then 70 g of Raney Nickel. Apply hydrogen to 100 atmosphere gauge pressure, and warm the mixture to 60 °C. Continue the reaction for 1 h to complete the hydrogenation.
2. After Nickel catalyst is removed by filtration, the pH of the aqueous solution is adjusted to 2 with 6 N HCl to crystallize the product. The acidified solution is allowed to stand at 0 °C for 16 h to complete the crystallization. The product is isolated by filtration and rinsed with 567 ml (3X final product) water.
3. To recrystallize the product, dissolve the crude product in 400 ml of methanol, and then add 800 ml of water as the anti-solvent. Keep the mixture at 0 °C for 16 h to finish the crystallization. Isolate the product by filtration and rinse with 567 ml water. After drying, 189 g of product **9** is obtained, corresponding to 72% yield.

| Input                    |          |                |            |                         |        |                 |               |        |
|--------------------------|----------|----------------|------------|-------------------------|--------|-----------------|---------------|--------|
| Chemical                 | Vol (ml) | Density (g/ml) | Weight (g) | Mw (g/mol)              | mol    | Role            | X/ref 2 (g/g) | PMI    |
| Compound 8               |          |                | 280        | 337                     | 0.83   | ref 2           | 1.00          | (7.1)  |
| water                    | 6000     | 1.0            | 6000       | 18                      | 333.33 | Solvent         | 21.43         | 152.9  |
| NaOH                     |          |                | 250        | 40                      | 6.25   | reactant        | 0.89          | 6.4    |
| Hydrogen*                |          |                | 1.66       | 2                       | 0.83   | reactant        | 0.01          | 0.04   |
| Raney Ni                 |          |                | 70         |                         |        | catalyst        | 0.25          | 1.8    |
| Total input              |          |                | 6602       |                         |        |                 | 23.58         | 161.1  |
| Theoretical Output       |          |                |            |                         |        |                 |               |        |
| Expected product         |          |                |            |                         |        |                 |               |        |
| <i>rac</i> - 9           |          |                | 261.72     | 315                     | 0.83   | Product         | 0.93          |        |
| Sodium acetate           |          |                | 68.13      | 82                      | 0.83   | by product      | 0.24          |        |
| Solvent, excess reactant |          |                |            |                         |        |                 |               |        |
| Water                    |          |                | 5985.04    |                         |        | Solvent         | 21.38         |        |
| NaOH                     |          |                | 216.77     |                         |        | Excess reactant | 0.77          |        |
| Raney Ni                 |          |                | 70.00      |                         |        | catalyst        | 0.25          |        |
| Total mass               |          |                | 6602       |                         |        |                 | 23.58         |        |
| Work up & isolation      |          |                |            |                         |        |                 |               |        |
| 6N HCl                   | 1041     | 1.11           | 1156       |                         |        |                 | 4.13          | 29.5   |
| (HCl)                    |          |                | (228)      | 36.5                    | 6.25   | acidify         | (0.81)        | (5.8)  |
| (Water)                  |          |                | (928)      |                         |        |                 | (3.31)        | (23.6) |
| Water                    |          |                | 567        |                         |        | Rinse           | 2.03          | 14.5   |
| MeOH                     | 400      | 0.79           | 316        |                         |        | Solvent         | 1.13          | 8.1    |
| water                    | 800      | 1              | 800        |                         |        | Anti-solvent    | 2.86          | 20.4   |
| water                    | 567      | 1              | 567        |                         |        | Rinse           | 2.03          | 14.5   |
| Total mass               |          |                | 2250       |                         |        |                 | 12.18         | 87.0   |
| Actual yield: 72%        |          |                |            |                         |        |                 |               |        |
| <i>rac</i> - 9           |          |                | 189        | 315                     | 0.60   |                 | 0.675         | 4.82   |
| <i>RF</i> <sub>2</sub>   |          | 1.486          |            | <i>CRF</i> <sub>2</sub> |        |                 | 7.137         |        |

\* Assuming only 1 equivalent of hydrogen is used.

### Step 3

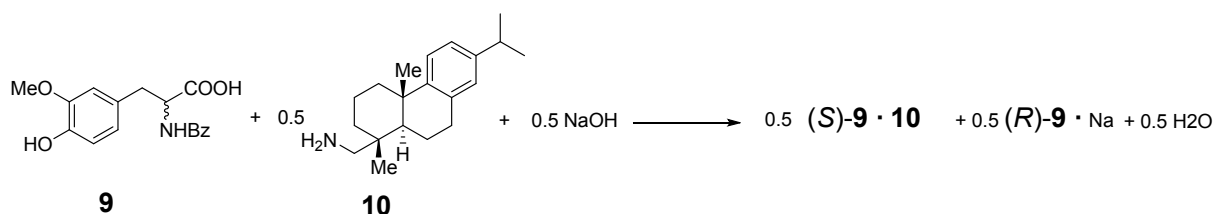

1. Prepare the half neutralized solution of **9** by mixing 31.5 g of **9** with 50 ml of 1 N NaOH and 80 ml of MeOH. Warm the solution to 50 °C to dissolve the solid. Add half



equivalent of resolution agent **10** as a methanol solution (14.2 g in 30 ml MeOH), followed by 10 ml MeOH rinse.

- If needed, seed the solution to initiate crystallization. Continue crystallization at 50 °C for 1 h, then decrease the temperature to 25 °C over 3 h. Maintain the temperature at 25 °C for 16 to finish the crystallization.
- Isolate the product by filtration. Rinse the crystalline solid with a cold (10 °C) mixture of MeOH and water (25 ml each). After drying, the amount of product (S)-**9**·**10** is 27 g, representing 45% yield (out of 50% theoretical yield).
- Mother liquor of the resolution:

| Chemical               | Mw  | Wt   | Mol   |
|------------------------|-----|------|-------|
| (R)- <b>9</b> (82% ee) | 315 | 17.3 | 0.055 |
| Compound <b>10</b>     | 285 | 1.4  | 0.005 |
| NaOH                   | 40  | 2.0  | 0.05  |
| MeOH (d 0.79)          | 32  | 114  |       |
| Water                  |     | 75   |       |

| Input                           |          |         |        |                  |       |                |          |        |
|---------------------------------|----------|---------|--------|------------------|-------|----------------|----------|--------|
| Chemical                        | Vol (ml) | Density | Weight | Mw               | mmol  | Role           | X/ref. 3 | PMI    |
| <i>rac</i> - <b>9</b>           |          |         | 31.5   | 315              | 100   | Reference 3    | 1.00     | (4.80) |
| NaOH (1N)                       | 50       | 1.04    | 52     |                  |       | Reactant       | 1.65     | 7.9    |
| (NaOH)                          |          |         | (2)    | 40               | 50    | Reactant       | (0.06)   | (0.3)  |
| (water)                         |          |         | (50)   |                  |       | Solvent        | (1.59)   | (7.6)  |
| Compound <b>10</b>              |          |         | 14.2   | 285              | 50    | Reactant       | 0.45     | 2.2    |
| MeOH                            | 120      | 0.79    | 94.8   |                  |       | Solvent        | 3.01     | 14.5   |
| Total                           |          |         | 192.5  |                  |       |                | 6.11     | 24.6   |
| Theoretical Output              |          |         |        |                  |       |                |          |        |
| <b>Expected product</b>         |          |         |        |                  |       |                |          |        |
| (S)- <b>9</b> · <b>10</b>       |          |         | 29.89  | 600              | 50    | <b>Product</b> | 0.95     |        |
| (R)- <b>10</b> ·Na              |          |         | 16.85  | 337              | 50    | by product     | 0.53     |        |
| H <sub>2</sub> O                |          | 1       | 0.90   | 18               | 50    | by product     | 0.03     |        |
| <b>Solvent, excess reactant</b> |          |         |        |                  |       |                |          |        |
| Water                           |          |         | 50     |                  |       | Solvent        | 1.59     |        |
| Methanol                        |          |         | 94.8   |                  |       | Solvent        | 3.01     |        |
| Total mass                      |          |         | 192.4  |                  |       |                | 6.11     |        |
| Work up & isolation             |          |         |        |                  |       |                |          |        |
| Water                           | 25       | 1       | 25     |                  |       | Rinse          | 0.79     | 3.8    |
| Methanol                        | 25       | 0.79    | 19.75  |                  |       | Rinse          | 0.63     | 3.0    |
| Total mass                      |          |         | 44.75  |                  |       |                | 1.42     | 6.8    |
| Actual yield: 45%               |          |         |        |                  |       |                |          |        |
| Salt (S)- <b>9</b> · <b>10</b>  |          |         | 27     | 600              | 0.045 | product        | 0.86     | 4.13   |
| RF <sub>3</sub>                 |          | 1.167   |        | CRF <sub>3</sub> |       |                | 4.803    |        |

## Step 4

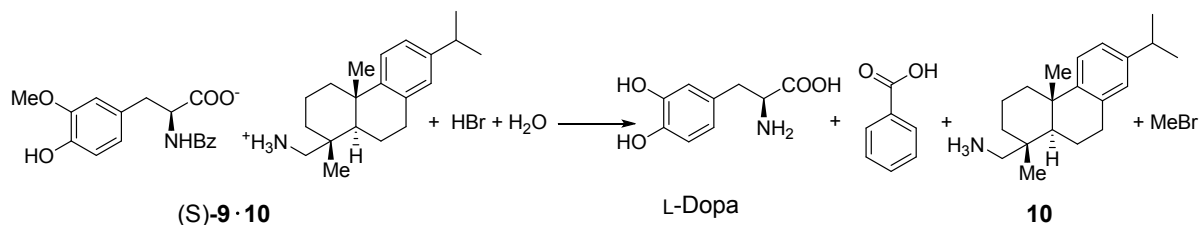

1. Mix 30 g of the salt of (S)-**9** and **10** from Step 3 with 5 ml of water, 5 ml of toluene, and 38.4 ml (61.5 g) of 62% HBr. The solution is refluxed between 105-112 °C for 3 h.
2. After cooling, extract the solution with toluene (50 ml X2) to remove benzoic acid.
3. Reduced the solution volume by 80% by evaporation to remove water and HBr, and dilute the residual solution with 60 ml of water. The solution is treated with 1.5 g of activated charcoal for color removal.
4. The product is crystallized by pH adjustment with ammonia solution (10%). The final pH for crystallization is 5.5. Allow the solution to stand at 25 °C for 16 h. Filter to recover the crystalline solid. Dry under vacuum to give 7.3 g of the L-Dopa product (74% yield).

| Input                           |           |          |                |                  |            |        |                 |                |       |
|---------------------------------|-----------|----------|----------------|------------------|------------|--------|-----------------|----------------|-------|
| Chemical                        | C (w/w %) | Vol (ml) | Density (g/ml) | Weight (g)       | Mw (g/mol) | mmol   | Role            | X/ref. 4 (g/g) | PMI   |
| (S)-9·10                        |           |          |                | 30.00            | 600        | 50.00  | Ref. 4          | 1.00           | (4.1) |
| Toluene                         |           | 5        | 0.87           | 4.35             |            |        | Solvent         | 0.145          | 0.60  |
| HBr solution                    | 62%       | 38.40    | 1.60           | 61.44            |            |        | Reactant        | 2.05           | 8.4   |
| (net HBr)                       |           |          |                | 38.09            | 81         | 470.28 | Reactant        | (1.27)         | (5.2) |
| (water)                         |           |          |                | 23.35            | 18         |        | Reactant        | (0.78)         | (3.2) |
| Water                           |           |          |                | 5.00             |            |        | Solvent         | 0.17           | 0.7   |
| Total input                     |           |          |                | 100.8            |            |        |                 | 3.36           | 9.7   |
| Theoretical Output              |           |          |                |                  |            |        |                 |                |       |
| L-Dopa                          |           |          |                | 9.85             | 197        | 50     | product         | 0.33           |       |
| Benzoic acid                    |           |          |                | 6.10             | 122        | 50     | by product      | 0.20           |       |
| dehydroabietylamine 10          |           |          |                | 14.25            | 285        | 50     | by product      | 0.48           |       |
| MeBr                            |           |          |                | 4.75             | 94.9       | 50     | by product      | 0.16           |       |
| <b>Solvent, excess reactant</b> |           |          |                |                  |            |        |                 |                |       |
| Toluene                         |           | 5        | 0.87           | 4.35             |            |        | Solvent         | 0.145          |       |
| Water                           |           |          |                | 27.45            |            |        | Solvent         | 0.91           |       |
| HBr                             |           |          |                | 34.04            | 81         | 420.28 | Excess reactant | 1.13           |       |
| Total output                    |           |          |                | 100.8            |            |        |                 | 3.36           |       |
| Work up & isolation             |           |          |                |                  |            |        |                 |                |       |
| Toluene                         |           | 100      | 0.87           | 87               |            |        | Solvent         | 2.9            | 11.9  |
| NH <sub>3</sub> solution*       | 10%       |          |                | 57.16            |            |        | Neutralize      | 1.91           | 7.9   |
| (net NH <sub>3</sub> )          |           |          |                | (5.72)           | 17         | 336.23 |                 | (0.19)         | (0.8) |
| (water)                         |           |          |                | (51.44)          |            |        |                 | (1.71)         | (7.0) |
| NH <sub>3</sub> solution**      | 10%       |          |                | 14.29            |            |        | Neutralize      | 0.48           | 2.0   |
| (Net NH <sub>3</sub> )          |           |          |                | (1.43)           | 17         | 84.06  |                 | (0.05)         | (0.2) |
| (water)                         |           |          |                | (12.86)          |            |        |                 | (0.43)         | (1.8) |
| Water                           |           |          |                | 60.00            |            |        | Solvent         | 2.00           | 8.2   |
| Active Carbon                   |           |          |                | 1.5              |            |        |                 | 0.05           | 0.2   |
| Total isolation mass            |           |          |                | 220              |            |        |                 | 7.34           | 30.1  |
| Actual yield 74%                |           |          |                |                  |            |        |                 |                |       |
| L-Dopa                          |           |          |                | 7.3              | 197        | 0.037  | Product         | 0.2433         | 1.00  |
| RF <sub>4</sub>                 |           | 4.116    |                | CRF <sub>4</sub> |            |        |                 | 4.116          |       |

\*NH<sub>3</sub> to neutralize the HBr in distillate \*\* NH<sub>3</sub> used in crystallization

### Step 2-1 Racemization of D-enantiomer<sup>2</sup> (mother liquor of Step 3)

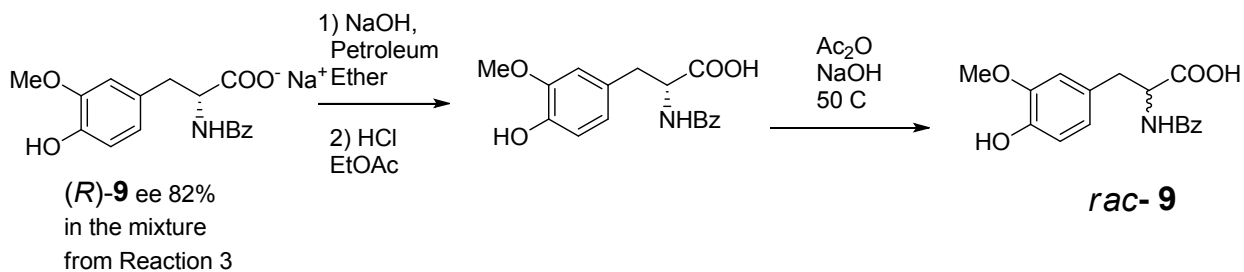

1. Add 50 ml of 2 N NaOH to the mother liquor of resolution in Step 3, and extract the aqueous mixture with 20 ml X2 petroleum ether.
2. Remove methanol from the aqueous phase by evaporation. The volume is reduced to 100 ml
3. Adjust the pH to <2 with 6 N HCl
4. Extract **(R)-9** with EtOAc (50 ml X 3 times)
5. Evaporate to remove EtOAc.
6. Mix the residue with 40 ml of 1 N NaOH, and 60 ml of acetic anhydride. Agitate the mixture at 50 °C for 4 h to complete the racemization.
7. Reduce the volume to 30 ml by evaporation.
8. Add 50 ml of water, and extract the mixture with EtOAc (50 ml X 2)
9. After solvent removal, 13 g of racemic **9** is isolated, representing 75% yield.

| Input for (R)-9 cleaning (based on waste stream from Step 3) |          |                |            |            |       |                  |               |
|--------------------------------------------------------------|----------|----------------|------------|------------|-------|------------------|---------------|
| Chemical                                                     | Vol (ml) | Density (g/ml) | Weight (g) | Mw (g/mol) | mol   | Role             | X/ref.3 (g/g) |
| (R)-9                                                        |          |                | 17.3       | 315        | 0.055 | Waste from step3 | (0.55)        |
| Compound 10                                                  |          |                | 1.4        | 285        | 0.005 | Waste from step3 | (0.04)        |
| NaOH                                                         |          |                | 2.0        | 40         | 0.050 | Waste from step3 | (0.06)        |
| MeOH                                                         | 120      | 0.79           | 114.6      |            |       | Waste from step3 | (3.64)        |
| Water                                                        | 75       |                | 75.0       |            |       | Waste from step3 | (2.38)        |
| 2N NaOH                                                      | 50.0     | 1.08           | 54.0       |            |       | pH adjustment    | 1.71          |
| (NaOH)                                                       |          |                | (4.0)      | 40.000     | 0.100 |                  | (0.13)        |
| (Water)                                                      |          |                | (50.0)     |            |       |                  | (1.59)        |
| Pet. Ether (d 0.64)                                          | 40.0     | 0.64           | 25.6       |            |       | Solvent          | 0.81          |
| 6 N HCl                                                      | 25.0     | 1.11           | 27.7       |            |       | pH adjustment    | 0.88          |
| (HCl)                                                        |          |                | (5.5)      | 36.500     | 0.150 |                  | (0.17)        |
| (Water)                                                      |          |                | (22.3)     |            |       |                  | (0.71)        |
| EtOAc                                                        | 150.0    | 0.90           | 134.6      |            |       | Solvent          | 4.76          |
| Total input                                                  |          |                | 452.1      |            |       |                  | 14.35         |
| Theoretical output                                           |          |                |            |            |       |                  |               |
| <b>Solvent, other chemicals</b>                              |          |                |            |            |       |                  |               |
| Compound 10                                                  |          |                | 1.4        |            |       |                  |               |
| MeOH                                                         |          |                | 114.6      |            |       |                  |               |
| Water                                                        |          |                | 150.0      | 18         |       |                  |               |
| Pet. Ether (d 0.64)                                          |          |                | 25.6       |            |       |                  |               |
| NaCl                                                         |          |                | 8.8        | 58.5       | 0.150 |                  |               |
| EtOAc                                                        |          |                | 134.6      |            |       |                  |               |
| <b>Cleaned (R)-9</b>                                         |          |                | 17.3       |            |       |                  |               |
| Total output                                                 |          |                | 452.1      |            |       |                  |               |
| Input for racemization                                       |          |                |            |            |       |                  |               |
| 1N NaOH                                                      | 40.0     | 1.04           | 41.6       |            |       |                  | 1.32          |
| (NaOH)                                                       |          |                | (1.6)      | 40         | 0.04  | Catalyst         | (0.05)        |
| (Water)                                                      |          |                | (40.0)     | 18         | 2.22  | reactant         | (1.27)        |
| Ac <sub>2</sub> O                                            | 60.0     | 1.082          | 64.93      | 102        | 0.64  | Catalyst         | 2.06          |
| Total input                                                  |          |                | 123.9      |            |       |                  | 3.93          |
| Theoretical output                                           |          |                |            |            |       |                  |               |
| <i>rac</i> -9                                                |          |                | 17.325     | 315        | 0.55  | product          |               |
| <b>Solvents, other chemicals</b>                             |          |                |            |            |       |                  |               |
| Water                                                        |          |                | 29.27      | 18         | 1.63  |                  |               |
| Sodium acetate                                               |          |                | 3.28       | 82         | 0.04  |                  |               |
| Acetic acid                                                  |          |                | 73.99      | 60         | 1.23  |                  |               |
| Total output                                                 |          |                | 123.9      |            |       |                  |               |
| Workup & isolation                                           |          |                |            |            |       |                  |               |
| Water                                                        |          |                | 50         |            |       |                  | 1.59          |
| EtOAc                                                        | 100      | 0.897          | 90         |            |       |                  | 2.84          |
| Total                                                        |          |                | 140        |            |       |                  | 4.43          |
| Step yield 75%                                               |          |                |            |            |       |                  |               |
| <i>rac</i> -9                                                |          |                | 13         | 315        | 0.41  |                  | 0.41          |

### Step 4-1 Decomposition of MeBr in a scrubber<sup>3</sup>

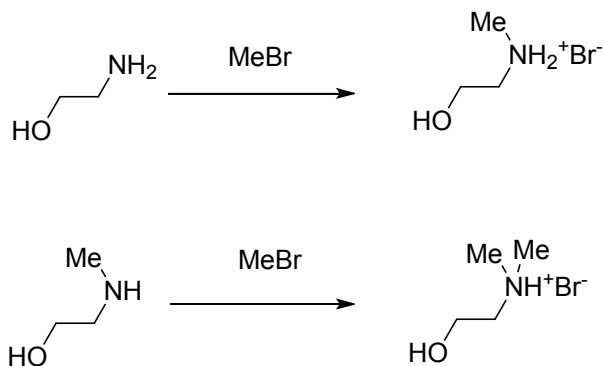

#### Description<sup>3</sup>

1. The MeBr byproduct from Step 4 is introduced in to the scrubber containing aqueous solution of 17.5wt % Ethanolamine.
2. After Reaction 4 completes, the scrubbing reaction continues for additional 2 h while the residual MeBr in Reaction 4 is purged by nitrogen.
3. The removal efficiency is 99.9%.

| Input for MeBr scrubbing                                |          |                |            |                           |       |                   |         |        |
|---------------------------------------------------------|----------|----------------|------------|---------------------------|-------|-------------------|---------|--------|
|                                                         | Vol (ml) | Density (g/ml) | Weight (g) | Mw (g/mol)                | mol   | Role              | X/ref 4 | PMI    |
| MeBr from Step 4                                        |          |                | 4.75       | 95                        | 0.050 | Step 4 by product | (0.16)  | (0.66) |
| Ethanolamine                                            |          | 1.01           | 82.49      | 61.1                      | 1.35  | Reactant          | 2.75    | 11.3   |
| Water                                                   |          |                | 387.6      |                           |       | Solvent           | 12.92   | 53.2   |
| Total input                                             |          |                | 474.8      |                           |       |                   | 15.83   | 64.5   |
| Theoretical output                                      |          |                |            |                           |       |                   |         |        |
| MeNH(CH <sub>2</sub> ) <sub>2</sub> OH HBr              |          |                | 7.02       | 156.02                    | 0.045 |                   | 0.23    |        |
| Me <sub>2</sub> N(CH <sub>2</sub> ) <sub>2</sub> OH HBr |          |                | 0.85       | 170.05                    | 0.005 |                   | 0.03    |        |
| NH <sub>2</sub> (CH <sub>2</sub> ) <sub>2</sub> OH      |          |                | 79.43      | 61.1                      | 1.300 |                   | 2.65    |        |
| Water                                                   |          |                | 387.6      |                           |       |                   | 12.92   |        |
| Total output                                            |          |                | 474.9      |                           |       |                   | 15.83   |        |
| <i>RF</i> <sub>4-1</sub>                                | 4.116    |                |            | <i>CRF</i> <sub>4-1</sub> | 4.116 |                   |         |        |

### Summary of mass efficiency for the process without racemization

| Step  | RF   | CRF  | Reactant | Catalyst | Solvent | Isolation | Total |
|-------|------|------|----------|----------|---------|-----------|-------|
| 1     | 0.56 | 4.02 | 17.3     | 4.0      | 1.3     | 80.3      | 102.9 |
| 2     | 1.49 | 7.13 | 6.4      | 1.8      | 152.9   | 87.0      | 248.1 |
| 3     | 1.17 | 4.8  | 10.1     | 0        | 14.5    | 6.8       | 31.4  |
| 4     | 4.12 | 4.12 | 8.4      | 0        | 1.3     | 30.1      | 39.8  |
| 4-1   | 4.12 | 4.12 | 11.3     | 0        | 53.2    | 0         | 64.5  |
| Total |      |      | 53.5     | 5.8      | 223.2   | 204.2     | 487   |

### PMI evaluation for alternative process: racemization of (*R*)-9 to give *rac*-9

#### Step 2-1 (*R*)-9 isolation and racemization.

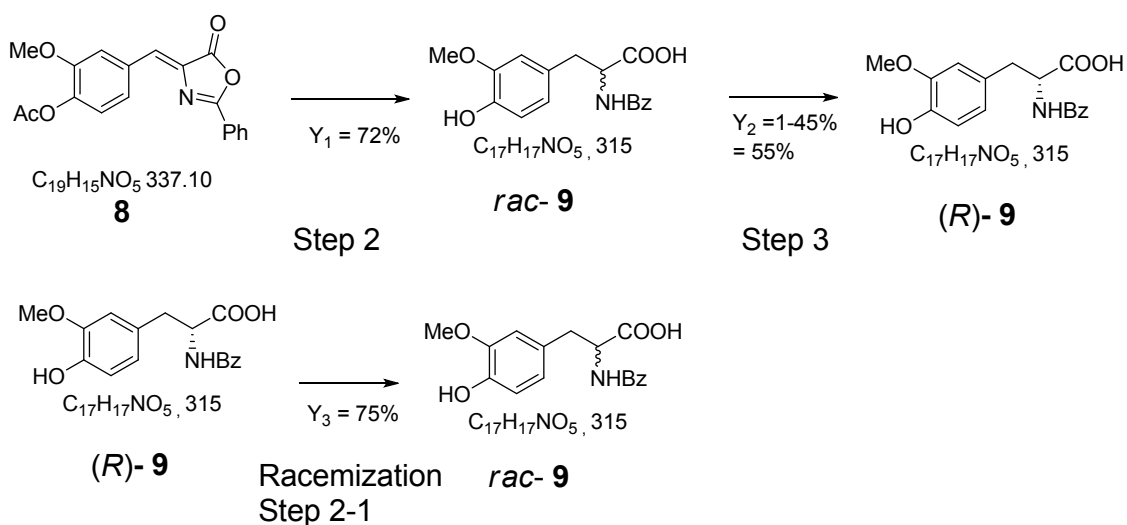

- The racemization reaction (Step 2-1) is a parallel route to prepare *rac*-9. The total yield of *rac*-9 is the sum of Step 2 and racemization (Step 2-1).

Yield from racemization with Compound **8** as the base =

$$Y_1 Y_2 Y_3 = 72\% \times 55\% \times 75\% = 29.7\%$$

$$\text{Total yield from both routes} = 29.7\% + 72\% = 101.7\%$$

- The *RF* for *rac*-9, with the additional racemization, is determined with the combined yield (effective yield):

$$RF_{2+rac} = \frac{1}{101.7\%} \frac{MW_{Compound\ 8}}{MW_{Compound\ 9}} = 1.052$$

Correspondingly,

$$CRF_{2+rac} = RF_{2+rac} * CFR_3 = 1.052 * 4.803 = 5.053$$

- The input for racemization uses *rac-9* from Step 2 (Ref 3) as the reference in the step protocol. For PMI evaluation, the reference should be adjusted to Compound **8** (Ref 2), the same reference as that in Step 2. The transformation factor is  $1/RF_2$  (0.6729) since:  
Mass of Ref 3  $\cdot RF_2$  = Mass of Ref 2



Mass inventory for racemization (Step 2-1) with Compound **8** (ref. 2) as the reference

| Input for (R)- <b>4</b> cleaning (based on waste stream from Reaction 3) |          |                |                            |        |       |                   |                             |         |             |
|--------------------------------------------------------------------------|----------|----------------|----------------------------|--------|-------|-------------------|-----------------------------|---------|-------------|
| Chemical                                                                 | Vol (ml) | Density (g/ml) | Weight (g)                 | Mw     | mol   | Role              | X/ref.3 (g/g)               | X/ref.2 | PMI         |
| (R)- <b>9</b>                                                            |          |                | 17.3                       | 315    | 0.055 | Waste from Step 3 | 0.55                        | 0.370   | (1.87)      |
| Compound <b>10</b>                                                       |          |                | 1.4                        | 285    | 0.005 | Waste from Step 3 | 0.04                        |         | (0.136)     |
| NaOH                                                                     |          |                | 2.0                        | 40     | 0.050 | Waste from Step 3 | 0.06                        |         | (0.204)     |
| MeOH                                                                     | 120      | 0.79           | 114.6                      |        |       | Waste from Step 3 | 3.64                        |         | (12.4)      |
| Water                                                                    | 75       |                | 75.0                       |        |       | Waste from Step 3 | 2.38                        |         | (8.09)      |
| 2N NaOH                                                                  | 50.0     | 1.08           | 54.0                       |        |       | pH adjustment     | 1.71                        | 1.15    | 5.8         |
| (NaOH)                                                                   |          |                | 4.0                        | 40.000 | 0.100 |                   | 0.13                        |         |             |
| (Water)                                                                  |          |                | 50.0                       |        |       |                   | 1.59                        | 1.07    | (5.41)      |
| Pet. Ether (d 0.64)                                                      | 40.0     | 0.64           | 25.6                       |        |       | Solvent           | 0.81                        | 0.545   | (2.8)       |
| 6 N HCl                                                                  | 25.0     | 1.11           | 27.7                       |        |       | pH adjustment     | 0.88                        | 0.592   | 3.0         |
| (HCl)                                                                    |          |                | 5.5                        | 36.500 | 0.150 |                   | 0.17                        |         |             |
| (Water)                                                                  |          |                | 22.3                       |        |       |                   | 0.71                        | 0.478   | (2.42)      |
| EtOAc                                                                    | 150.0    | 0.90           | 134.6                      |        |       | Solvent           | 4.76                        | 3.20    | 16.2        |
| Total input                                                              |          |                | 452.1                      |        |       |                   |                             |         | <b>27.8</b> |
| Input for racemization                                                   |          |                |                            |        |       |                   |                             |         |             |
| 1N NaOH                                                                  | 40.0     | 1.04           | 41.6                       |        |       |                   | 1.32                        | 0.888   | 4.5         |
| (NaOH)                                                                   |          |                | 1.6                        | 40     | 0.04  | Catalyst          | 0.05                        |         |             |
| (Water)                                                                  |          |                | 40.0                       | 18     | 2.22  | reactant          | 1.27                        | 0.855   | (4.32)      |
| Ac <sub>2</sub> O                                                        | 60.0     | 1.082          | 64.93                      | 102    | 0.64  | Catalyst          | 2.06                        | 1.39    | 7.00        |
| Total input                                                              |          |                | 123.9                      |        |       |                   |                             |         | <b>11.5</b> |
| Workup & isolation                                                       |          |                |                            |        |       |                   |                             |         |             |
| Water                                                                    |          |                | 50                         |        |       |                   | 1.59                        | 1.07    | 5.4         |
| EtOAc                                                                    | 100      | 0.897          | 90                         |        |       |                   | 2.84                        | 1.91    | 9.7         |
| Total                                                                    |          |                | 140                        |        |       |                   |                             |         | <b>15.0</b> |
| Step yield 75%                                                           |          |                |                            |        |       |                   |                             |         |             |
| <i>rac</i> - <b>9</b>                                                    |          |                | 13                         | 315    | 0.41  |                   | 0.41                        | 0.276   | 1.39        |
| <i>RF</i> <sub>2</sub>                                                   |          | 1.486          | <i>RF</i> <sub>2+rac</sub> |        | 1.052 |                   | <i>CRF</i> <sub>2+rac</sub> |         | 5.053       |

Mass Inventory for Step 2 when racemization is included in the process

| Input                 |          |                |              |       |      |               |               |              |
|-----------------------|----------|----------------|--------------|-------|------|---------------|---------------|--------------|
| Chemical              | Vol (ml) | Density (g/ml) | Weight (g)   | Mw    | mol  | Role          | X/ref 2 (g/g) | PMI          |
| Compound <b>8</b>     |          |                | 280          | 337   | 0.83 | ref 2         | 1.00          | (5.05)       |
| water                 | 6000     | 1.0            | 6000         | 18    | 333  | Solvent       | 21.43         | 108.3        |
| NaOH                  |          |                | 250          | 40    | 6.25 | reactant      | 0.89          | 4.5          |
| Hydrogen              |          |                | 1.66         | 2     | 0.83 | reactant      | 0.01          | 0.04         |
| Raney Ni              |          |                | 70           |       |      | catalyst      | 0.25          | 1.3          |
| Total input           |          |                | 6601.7       |       |      |               | 23.58         | <b>114.1</b> |
| Work up & isolation   |          |                |              |       |      |               |               |              |
| 6N HCl                | 1041     | 1.11           | 1156.3       |       |      |               | 4.13          | 20.9         |
| (HCl)                 |          |                | 228.1        | 36.5  | 6.25 | acidify       | 0.81          |              |
| (Water)               |          |                | 928.1        |       |      |               | 3.31          | (16.7)       |
| Water                 |          |                | 567          |       |      | Rinse         | 2.03          | 10.3         |
| MeOH                  | 400      | 0.79           | 316          |       |      | Solvent       | 1.13          | 5.7          |
| Water                 | 800      | 1              | 800          |       |      | Anti-solvent  | 2.86          | 14.5         |
| Water                 | 567      | 1              | 567          |       |      | Rinse         | 2.03          | 10.3         |
| Total mass            |          |                | 2250         |       |      |               | 12.18         | <b>61.5</b>  |
| Actual yield: 72%     |          |                |              |       |      |               |               |              |
| <i>rac</i> - <b>9</b> |          |                | 189          | 315   | 0.60 |               | 0.675         | <b>3.411</b> |
| $RF_2$                | 1.486    |                | $RF_{2+rac}$ | 1.052 |      | $CRF_{2+rac}$ |               | 5.053        |

The total PMI of *rac*-**9** from two routes = 1.39 + 3.411 = 4.801, which equals to the PMI of *rac*-**9** in Step 3.

For Step 1: the new  $CRF_1 = RF_1 * CRF_{2+rac} = 0.5638 * 5.053 = 2.849$ . The required PMI of Compound **8** from Step 1 is reduced from 7.20 to 5.05.

Mass Inventory for Step 1 when racemization is included in the process

| Input               |          |                |            |            |       |                 |               |      |
|---------------------|----------|----------------|------------|------------|-------|-----------------|---------------|------|
| Chemical            | Vol (ml) | Density (g/ml) | Weight (g) | Mw (g/mol) | mol   | Role            | X/ref 1 (g/g) | PMI  |
| Vanillin 5          |          |                | 76         | 152        | 0.50  | Reference 1     | 1.00          | 2.9  |
| Hippuric acid 6     |          |                | 89.5       | 179        | 0.50  | reactant        | 1.18          | 3.4  |
| Acetic anhydride    | 150      | 1.08           | 162        | 102        | 1.59  | reactant        | 2.13          | 6.1  |
| Sodium acetate      |          |                | 75         | 82         | 0.91  | catalyst        | 0.99          | 2.8  |
| DMF                 | 25       | 0.944          | 23.6       |            |       | Solvent         | 0.31          | 0.9  |
| Total input         |          |                | 426.1      |            |       |                 | 5.61          | 16.0 |
| Theoretical Output  |          |                |            |            |       |                 |               |      |
| Expected product    |          |                |            |            |       |                 |               |      |
| Compound 8          |          |                | 168.5      | 337        | 0.50  | Product         | 2.22          |      |
| Acetic acid         |          |                | 90.0       | 60         | 1.50  | by product      | 1.18          |      |
| Water               |          |                | 9.0        | 18         | 0.50  | by product      | 0.12          |      |
| Solvent, excess     |          |                |            |            |       |                 |               |      |
| Acetic anhydride    |          | 1.08           | 60.0       | 102        | 0.59  | excess reactant | 0.79          |      |
| Sodium acetate      |          |                | 75.0       | 82         | 0.91  | catalyst        | 0.99          |      |
| DMF                 |          | 0.944          | 23.6       |            |       | solvent         | 0.31          |      |
| Total output        |          |                | 426.1      |            |       |                 | 5.61          |      |
| Work up & isolation |          |                |            |            |       |                 |               |      |
| Water               | 700      | 1              | 700        |            |       | Anti-solvent    | 9.21          | 26.2 |
| water               | 816      | 1              | 816        |            |       | Rinse           | 10.7          | 30.5 |
| Total Mass          |          |                | 1516       |            |       |                 | 19.9          | 56.7 |
| Actual yield: 80%   |          |                |            |            |       |                 |               |      |
| Compound 3          |          |                | 136        | 337        | 0.40  | Product         | 1.79          | 5.09 |
| $RF_1$              | 0.5638   |                |            | $CRF_1$    | 2.849 |                 |               |      |

Summary of material efficiency with racemization in the process

Contribution to global PMI by reaction steps

| Step  | RF   | CRF  | Reactant | Catalyst | Solvent | Isolation | Total |
|-------|------|------|----------|----------|---------|-----------|-------|
| 1     | 0.56 | 2.85 | 12.3     | 2.8      | 0.9     | 56.7      | 72.7  |
| 2     | 1.49 | 5.05 | 4.6      | 1.3      | 108.3   | 61.5      | 175.7 |
| Rac.  | 1.05 | 5.05 | 0        | 11.5     | 0.00    | 42.8      | 54.3  |
| 3     | 1.17 | 4.8  | 10.1     | 0        | 14.5    | 6.8       | 31.4  |
| 4     | 4.12 | 4.12 | 8.4      | 0        | 1.3     | 30.1      | 39.8  |
| 4-1   | 4.12 | 4.12 | 11.3     | 0.00     | 53.2    | 0.00      | 64.5  |
| Total |      |      | 46.7     | 15.6     | 178.2   | 197.9     | 438   |

## References

1. Jaffe, G. M., Rehl, W. R., Hoffman-La Roche, US 3714242, 1973
2. Kaiser, A. Scheer, M., Hausermann, W., Marti, L., Hoffman-La Roche, US3969397, 1976
3. K. Hettenback, D. J. am Ende, K. Leeman, E. Dias, N. Kasthurikrishnan, S. J. Brenek and P. Ahlijanian, *Org. Pro.Res. Dev.* 2002, **6**, 407-415

### Flow diagram of Roche Process to manufacture 100 kg L-Dopa

| Roche Process Flow Diagram Step 1 |        |   |                            |                   |            |                         | Reaction Yield     | 0.8   |                        |                      |
|-----------------------------------|--------|---|----------------------------|-------------------|------------|-------------------------|--------------------|-------|------------------------|----------------------|
| Input                             | Kg     |   | Stream                     | Waste (Kg)        | Time (h)   | Stream 1-1              | Weight (kg)        | kMol  |                        |                      |
| Vanillin <b>5</b>                 | 402.26 | → | Erlenmeyer reaction        |                   |            | Acetic acid             | 476.4              | 7.94  | From reaction          |                      |
| Hippuric acid <b>6</b>            | 473.7  |   |                            |                   | 20         | NaOAc                   | 398.2              | 4.86  |                        |                      |
| NaOAc                             | 398.2  |   |                            |                   |            | DMF                     | 124.90             |       |                        |                      |
| Ac <sub>2</sub> O                 | 857.4  |   | ↓                          |                   |            | (Ac <sub>2</sub> O)     | (318.5)            | 3.12  | excess                 |                      |
| DMF                               | 124.9  |   |                            |                   |            | HOAc                    | 374.4              | 6.24  | from Ac <sub>2</sub> O |                      |
|                                   |        |   |                            |                   |            | Water                   | 3696.4             |       |                        |                      |
|                                   |        |   |                            |                   |            | Stream total            | 5070               |       |                        |                      |
| Water                             | 3705   | → | Crystallization, isolation | →                 | 5036.55    | 4                       |                    |       |                        |                      |
|                                   |        |   |                            |                   |            |                         |                    |       |                        |                      |
|                                   |        |   | ↓                          |                   |            | <b>Stream 1-2</b>       |                    |       |                        |                      |
|                                   |        |   |                            |                   |            |                         | Water              | 4319  |                        |                      |
|                                   |        |   |                            |                   |            |                         | Organic            | 178.2 |                        | Un-isolated <b>8</b> |
| Water                             | 4319   | → | Rinse, dry                 | →                 | 4439.30    | Stream total            | 4497               |       |                        |                      |
|                                   |        |   |                            |                   |            |                         |                    |       |                        |                      |
|                                   |        |   | ↓                          |                   |            |                         |                    |       |                        |                      |
| <b>Reaction input</b>             | 2256   |   |                            |                   |            |                         |                    |       |                        |                      |
| <b>Isolation input</b>            | 8024   |   |                            | Compound <b>8</b> | <b>1-3</b> | <b>Est. Total waste</b> | <b>Total waste</b> |       |                        |                      |
| <b>Total input</b>                | 10280  |   | 713                        |                   | 9567       | 9567                    |                    |       |                        |                      |

| Roche Process Flow Diagram Step 2 |       |   |                                 |                                   |            |                         | Reaction Yield     | 0.72        |      |               |
|-----------------------------------|-------|---|---------------------------------|-----------------------------------|------------|-------------------------|--------------------|-------------|------|---------------|
| Input                             | Kg    |   |                                 | Stream                            | Waste (Kg) | Time (h)                | Stream 2-1         | Weight (kg) | kMol |               |
| Compound 8                        | 713   | → | Hydrogenation, 100 atm, 60 °C   | 2-1                               |            |                         | Raney Ni           | 178.4       |      |               |
| NaOH                              | 637   |   |                                 | →                                 | 178.37     | 1                       |                    |             |      |               |
| Water                             | 15280 |   |                                 |                                   |            |                         | <b>Stream 2-2</b>  |             |      |               |
| Raney Ni                          | 178.4 |   | ↓                               |                                   |            |                         | NaOAc              | 173.7       | 2.12 |               |
| H <sub>2</sub>                    | 4.3   |   |                                 |                                   |            |                         | (NaOH)             | 552.3       | 13.8 |               |
|                                   |       |   |                                 |                                   |            |                         | (HCl)              | 580.9       | 15.9 |               |
|                                   |       |   | Crystallization 0 °C, isolation | 2-2                               |            |                         | NaCl               | 807.        | 13.8 |               |
| 6N HCl                            | 2945  | → |                                 | →                                 | 20311.81   | 16                      | HCl                | 76.7        | 2.1  |               |
| Water                             | 1447  |   |                                 |                                   |            |                         | Water              | 19301       |      |               |
|                                   |       |   | ↓                               |                                   |            |                         | Stream total       | 20359       |      |               |
|                                   |       |   |                                 |                                   |            |                         | <b>Stream 2-3</b>  |             |      |               |
| MeOH                              | 806   | → |                                 | Recrystallization 0 °C, isolation | 2-3        |                         |                    | MeOH        | 806  |               |
| Water                             | 3487  |   | →                               |                                   | 4467.70    | 16                      | Water              | 3487        |      |               |
|                                   |       |   |                                 |                                   |            |                         | Organic            | 187         |      | Un-isolated 9 |
|                                   |       |   | ↓                               |                                   |            |                         | Stream total       | 4480        |      |               |
| <b>Reaction input</b>             | 16813 |   |                                 |                                   |            |                         |                    |             |      |               |
| <b>Isolation input</b>            | 8685  |   |                                 | <i>rac-9</i>                      | 2-4        | <b>Est. Total waste</b> | <b>Waste total</b> |             |      |               |
| <b>Total input</b>                | 25498 |   | 480                             |                                   | 25018      | 25018                   |                    |             |      |               |

| Roche Process Flow Diagram Step 3 |        |   |                                        |        |                  |             | Reaction Yield                                              | 0.45        |       |
|-----------------------------------|--------|---|----------------------------------------|--------|------------------|-------------|-------------------------------------------------------------|-------------|-------|
| Input                             | Kg     |   |                                        | Stream | Waste (Kg)       | Time (h)    | Stream 3-1                                                  | Weight (kg) | kMol  |
| <i>rac</i> - 9                    | 480.2  | → | Diastereomer Crystallization, 25-50 °C |        |                  |             | ( <i>R</i> )-9                                              | 264.10      | 0.84  |
| 1 N NaOH                          | 792.29 |   |                                        |        |                  | 20          | Compound 10                                                 | 20.58       | 0.072 |
| Methanol                          | 1441   |   |                                        |        |                  |             | NaOH                                                        | 30.4        | 0.76  |
| Compound 10                       | 216.1  |   |                                        |        |                  |             | MeOH                                                        | 1742.08     |       |
|                                   |        |   |                                        |        |                  |             | Water                                                       | 1143.16     |       |
| MeOH                              | 301.6  | → | Isolation by filtration and drying     | 3-1    |                  |             | <i>(R)</i> -9 in Stream 3-1 can be recycled by racemization |             |       |
| Water                             | 381.26 |   |                                        |        | →                | 3200.30     |                                                             |             |       |
|                                   |        |   |                                        |        |                  |             |                                                             |             |       |
| <b>Reaction input</b>             | 2929   |   |                                        |        |                  |             |                                                             |             |       |
| <b>Isolation input</b>            | 682.81 |   | Salt of ( <i>S</i> )-9- 10             | 3-2    | Est. total waste | Waste total |                                                             |             |       |
| <b>Total input</b>                | 3612   |   | 412                                    |        | 3200             | 3200        |                                                             |             |       |

| Roche Process Flow Diagram Step 4 |       |   |                                                                                                     |        |            |          | Reaction Yield            | 0.74              |      |              |
|-----------------------------------|-------|---|-----------------------------------------------------------------------------------------------------|--------|------------|----------|---------------------------|-------------------|------|--------------|
| Input                             | Kg    |   |                                                                                                     | Stream | Waste (Kg) | Time (h) | Stream 4-2                | Wt (kg)           | kMol |              |
| Salt of (S)-9-10                  | 411.6 | → | Deprotection<br>Reflux at 110 °C                                                                    | 4-1    |            |          | Toluene                   | 1244.62           |      |              |
| Toluene                           | 59.27 |   |                                                                                                     | →      | 65.10      | 3        | Benzoic acid<br>(122)     | 83.69             | 0.69 |              |
| 62% HBr                           | 843.7 |   |                                                                                                     |        |            |          |                           |                   |      |              |
| Water                             | 68.61 |   |                                                                                                     | ↓      |            |          |                           |                   |      |              |
|                                   |       |   | Remove benzoic acid by<br>extraction with toluene                                                   | 4-2    |            |          | <b>Stream 4-3</b>         |                   |      |              |
| Toluene                           | 1185  | → |                                                                                                     | →      | 1328.30    |          | NH <sub>4</sub> Br (97.9) | 452.71            | 4.62 |              |
|                                   |       |   |                                                                                                     |        |            |          | Water                     | 1009.01           |      |              |
|                                   |       |   | Evaporation (80%<br>reduction) to remove HBr,<br>then neutralize distillate<br>with NH <sub>3</sub> |        |            |          | <b>Stream 4-4</b>         |                   |      |              |
|                                   |       |   |                                                                                                     | ↓      |            |          | Activated<br>carbon       | 20.58             |      |              |
| NH <sub>3</sub> (10%)             | 786.1 | → |                                                                                                     | 4-3    |            |          |                           |                   |      |              |
|                                   |       |   |                                                                                                     | →      | 1461.72    |          | 1                         | <b>Stream 4-5</b> |      |              |
|                                   |       |   |                                                                                                     |        |            |          | NH <sub>4</sub> Br (97.9) | 113.77            | 1.16 |              |
|                                   |       |   | ↓                                                                                                   |        |            |          | Water                     | 1076.34           |      |              |
|                                   |       |   | Discoloration, filtration                                                                           | 4-4    |            |          | Compound 10               | 195.50            | 0.69 |              |
|                                   |       |   |                                                                                                     | →      |            |          | Organic                   | 34.6              |      | Unisolated 1 |
| Water                             | 823.2 | → |                                                                                                     |        |            | 20.58    |                           |                   |      |              |
| Activated carbon                  | 20.58 |   |                                                                                                     |        |            |          |                           |                   |      |              |



Continue from the last page

|                        |        |   |                                               |     |                         |                    |  |  |  |  |
|------------------------|--------|---|-----------------------------------------------|-----|-------------------------|--------------------|--|--|--|--|
|                        |        |   | ↓                                             |     |                         |                    |  |  |  |  |
|                        |        |   |                                               |     |                         |                    |  |  |  |  |
|                        |        |   |                                               |     |                         |                    |  |  |  |  |
|                        |        |   |                                               | 4-5 |                         |                    |  |  |  |  |
| 10% NH <sub>3</sub>    | 197.6  | → | Crystallization, Product isolation and drying |     |                         |                    |  |  |  |  |
|                        |        |   |                                               |     | 1420.25                 |                    |  |  |  |  |
|                        |        |   |                                               |     |                         |                    |  |  |  |  |
|                        |        |   | ↓                                             |     |                         |                    |  |  |  |  |
|                        |        |   |                                               |     |                         |                    |  |  |  |  |
| <b>Reaction input</b>  | 2568.5 |   |                                               |     |                         |                    |  |  |  |  |
| <b>Isolation input</b> | 1827.4 |   |                                               |     |                         |                    |  |  |  |  |
|                        |        |   | L-Dopa product (Kg)                           | 4-6 |                         |                    |  |  |  |  |
|                        |        |   |                                               |     | <b>Est. total waste</b> |                    |  |  |  |  |
|                        |        |   |                                               |     |                         | <b>Waste total</b> |  |  |  |  |
| <b>Step total</b>      | 4396   |   | <b>100</b>                                    |     | 4296                    | 4296               |  |  |  |  |

| Roche Process Flow Diagram MeBr decomposition, Step 4-1 |        |   |                                |        |            |          |  |                                                    |                                                         |       |      |
|---------------------------------------------------------|--------|---|--------------------------------|--------|------------|----------|--|----------------------------------------------------|---------------------------------------------------------|-------|------|
|                                                         | Kg     |   |                                | Stream | Waste (Kg) | Time (h) |  |                                                    |                                                         |       |      |
| MeBr (Stream 4-1)                                       | 65.10  | → | Decompose MeBr with a scrubber | 4-7    |            |          |  |                                                    | kMol                                                    |       |      |
| Ethanolamine                                            | 1133   |   |                                |        | →          | 6509.3   |  |                                                    | MeNH(CH <sub>2</sub> ) <sub>2</sub> OH HBr              | 96.80 | 0.62 |
| Water                                                   | 5312.0 |   |                                |        |            |          |  |                                                    | Me <sub>2</sub> N(CH <sub>2</sub> ) <sub>2</sub> OH HBr | 11.07 | 0.07 |
|                                                         |        |   |                                |        |            |          |  |                                                    | Water                                                   | 5312  |      |
|                                                         |        |   |                                |        |            |          |  |                                                    | (HBr)                                                   |       | 0.69 |
| <b>Total Input</b>                                      | 6509.8 |   |                                |        |            |          |  | NH <sub>2</sub> (CH <sub>2</sub> ) <sub>2</sub> OH | 1089.40                                                 | 17.86 |      |
|                                                         |        |   |                                |        |            |          |  | <b>Total Waste</b>                                 | 6509.3                                                  |       |      |

## The Monsanto Process

### Reaction 1

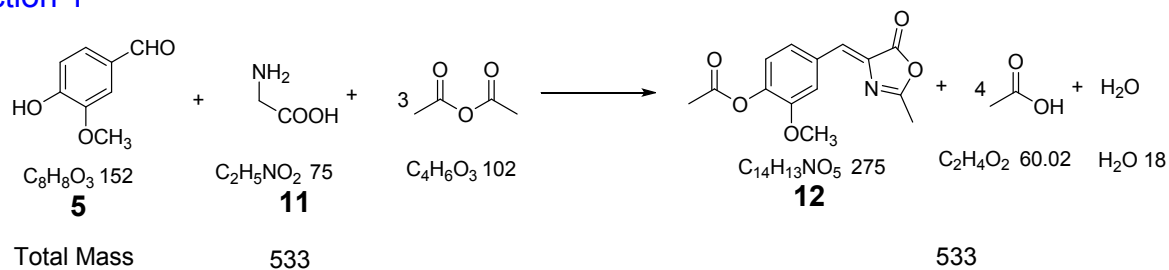

### Reaction 2

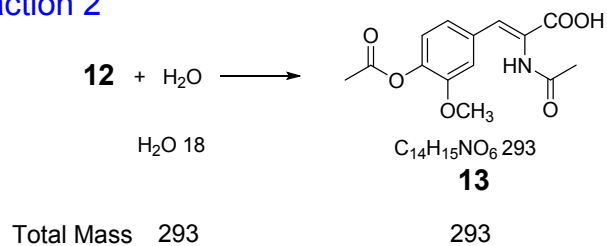

### Reaction 3

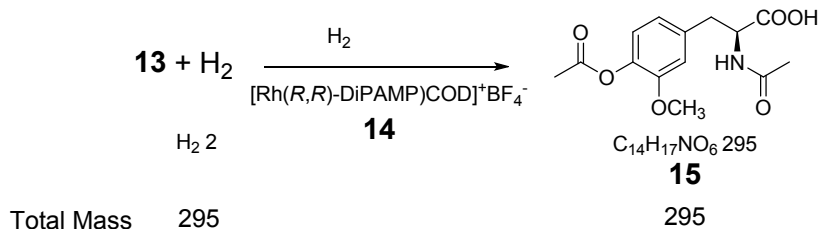

### Reaction 4

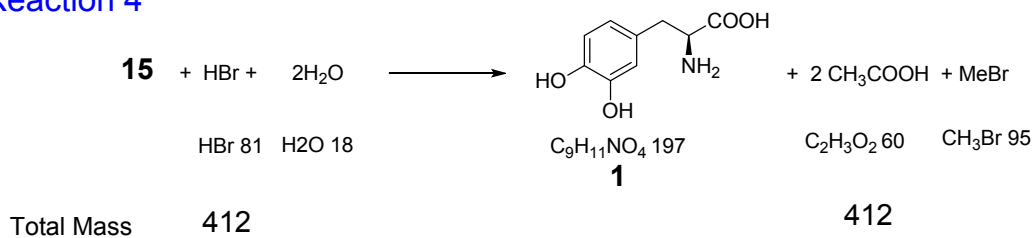

## Atom economy

| Reaction     | Input                  | Output        | Mw  | Equivalent | Mass       |
|--------------|------------------------|---------------|-----|------------|------------|
| 1            | <b>5</b>               |               | 152 | 1          | 152        |
|              | <b>11</b>              |               | 75  | 1          | 75         |
|              | <b>Ac<sub>2</sub>O</b> |               | 102 | 3          | 306        |
|              |                        | <b>12</b>     | 275 | 1          |            |
| 2            | <b>H<sub>2</sub>O</b>  |               | 18  | 1          | 18         |
|              |                        | <b>13</b>     | 293 | 1          |            |
| 3            | <b>H<sub>2</sub></b>   |               | 2   | 1          | 2          |
|              |                        | <b>15</b>     | 295 | 1          |            |
| 4            | <b>HBr</b>             |               | 81  | 1          | 81         |
|              | <b>H<sub>2</sub>O</b>  |               | 18  | 2          | 36         |
|              |                        | <b>L-Dopa</b> |     | 1          | <b>197</b> |
| Total input  |                        |               |     |            | 670        |
| Atom economy | 0.294                  |               |     |            |            |

### Lab Protocol of the Monsanto Process<sup>1</sup>

#### Outline:

1. Azlactone (Z)-2-methoxy-4-((2-methyl-5-oxooxazol-4(5H)-ylidene)methyl)phenyl acetate (**12**) is prepared by Erlenmeyer reaction from vanillin and glycine.
2. The azlactone **12** is then hydrolyzed to give the corresponding acetyl enamide **13**.
3. The enamide is reduced to the corresponding amide **15** by asymmetric hydrogenation with a [Rh(*R,R*)-DiPAMP]COD]<sup>+</sup>BF<sub>4</sub><sup>-</sup> catalyst.
4. L-Dopa product is produced by de-protection of **15** with HBr.

#### Step 1

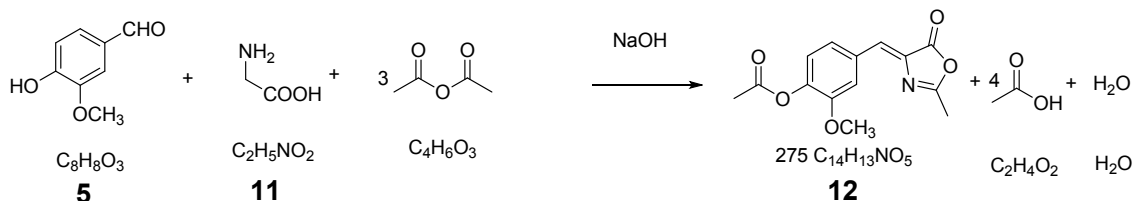

#### Description: <sup>1,3</sup>

1. Mix 300 g of acetic anhydride, 10 g of NaOH, and 152 g vanillin (**5**), heat to 100 °C over 2 h.

- Add 75 g glycine (**11**) and 102 g of acetic anhydride over 1 h. Hold the temperature for additional 2 h at 90-95 °C.
- To start crystallization Cool to 50 °C over 2 h. and Decrease to 25 °C over 1 h and hold the temperature for 1 h to finish. Isolate the product **12** by filtration.
- Wash the product with 200 g acetic acid under ambient temperature. The procedure gives 190 g of the azalactone product **12** (yield 69%)<sup>2</sup>

| Input               |          |                |            |         |       |                 |          |       |
|---------------------|----------|----------------|------------|---------|-------|-----------------|----------|-------|
| Chemical            | Vol (ml) | Density (g/ml) | Weight (g) | Mw      | Mol   | Role            | X/ref. 1 | PMI   |
| Vanillin <b>5</b>   |          |                | 152        | 152     | 1.00  | Ref 1           | 1.00     | 1.63  |
| Acetic anhydride    |          | 1.08           | 402        | 102     | 3.94  | Reactant        | 2.64     | 4.32  |
| NaOH                |          |                | 10         | 40      | 0.25  | Catalyst        | 0.07     | 0.114 |
| Glycine <b>11</b>   |          |                | 75         | 75      | 1.00  | Reactant        | 0.49     | 0.801 |
| Total input         |          |                | 639        |         |       |                 | 4.20     | 6.87  |
| Theoretical Output  |          |                |            |         |       |                 |          |       |
| Expected Product    |          |                |            |         |       |                 |          |       |
| Compound <b>12</b>  |          |                | 275        | 275     | 1     | Product         | 1.81     |       |
| (Acetic acid)       |          |                |            | 60      | 4     | by product      |          |       |
| (water)             |          |                |            | 18      | 1     | by product      |          |       |
| (NaOH)              |          |                |            | 40      | 0.25  | Catalyst        |          |       |
| (Acetic anhydride)  |          |                |            | 102     | 0.94  | Excess reactant |          |       |
| Acetic acid         |          | 1.05           | 337.9      | 60      | 5.63  |                 | 2.22     |       |
| NaOAc               |          |                | 20.5       | 82      | 0.25  |                 | 0.13     |       |
| Water               |          | 1              | 5.6        | 18      | 0.31  |                 | 0.04     |       |
| Total               |          |                | 639        |         |       |                 | 4.20     |       |
| Work up & isolation |          |                |            |         |       |                 |          |       |
| Acetic acid         |          | 1.05           | 200        |         |       |                 | 1.32     | 2.158 |
| Actual Yield 69%    |          |                |            |         |       |                 |          |       |
| Compound <b>12</b>  |          |                | 190        | 275     | 0.69  |                 | 1.25     | 2.04  |
| $RF_1$              | 0.8011   |                |            | $CRF_1$ | 1.635 |                 |          |       |

## Step 2

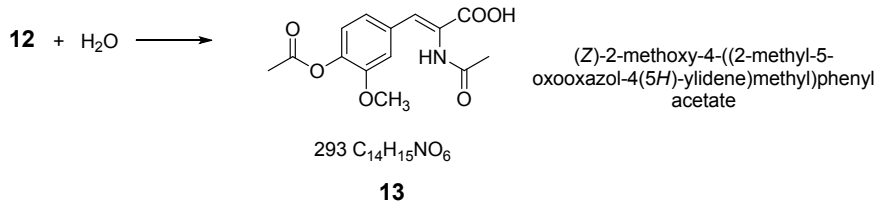

### Description:

- Hydrolysis: add 100 g **12** to 100 g water and 300 g of acetone (density = 0.79). Heat to reflux at 65 °C for 1 h and hold for 3 h.
- Start to crystallize **13** by distilling off acetone (bp = 56 °C) over 4 h. Cool to room temperature over 2 h.
- The liquid is removed by filtration to give 101.3 g of **13**, corresponding to 95% yield.

| Input                      |          |                |            |         |       |                 |          |        |
|----------------------------|----------|----------------|------------|---------|-------|-----------------|----------|--------|
| Chemical                   | Vol (ml) | Density (g/ml) | Weight (g) | Mw      | mol   | Role            | X/ref. 2 | PMI    |
| Compound <b>12</b>         |          |                | 100        | 275     | 0.36  | <b>Ref 2</b>    | 1.00     | (2.04) |
| Acetone                    |          | 0.79           | 300        | 58      | 5.17  | solvent         | 3.00     | 6.12   |
| Water                      |          |                | 100        | 18      | 5.56  | reactant        | 1.00     | 2.04   |
| Total input                |          |                | 500        |         |       |                 | 5.00     | 8.2    |
| Theoretical Output         |          |                |            |         |       |                 |          |        |
| Expected product           |          |                |            |         |       |                 |          |        |
| Compound <b>13</b>         |          |                | 106.55     | 293     | 0.36  | Product         | 1.07     |        |
| Solvents, excess reactants |          |                |            |         |       |                 |          |        |
| Acetone                    |          |                | 300        |         |       | Solvent         | 3.00     |        |
| Water                      |          |                | 93.45      | 18      | 5.19  | Excess reactant | 0.93     |        |
| Total output               |          |                | 500        |         |       |                 | 5.00     |        |
| Actual yield 95%           |          |                |            |         |       |                 |          |        |
| Compound <b>13</b>         |          |                | 101.3      | 293     | 0.35  |                 | 1.01     | 2.064  |
| $RF_2$                     | 0.988    |                |            | $CRF_2$ | 2.041 |                 |          |        |

### Step 3

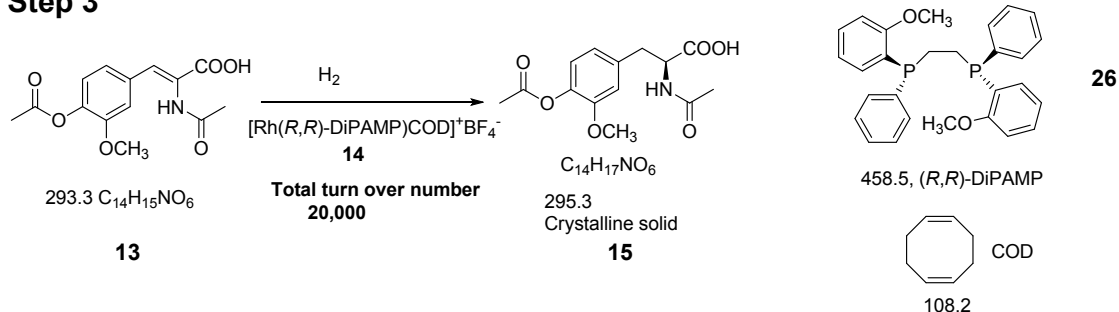

Description: <sup>3</sup>

1. Mix 100 g of **13** with 664 g iPrOH and 82.5 g Water, 37 g of 50% NaOH. The product is a slurry.
2. Purge the solution with nitrogen twice, followed by applying hydrogen at gauge pressure of 3.5 atm.
3. Raise the temperature to 50 °C over 1 h.
4. Add the solution of catalyst **14** (in 2 g of iPrOH), and continue the reaction for 1 h to complete. Cool the solution to 25 °C over 1 h.
5. Add 46 g of concentrated HCl (37%, d = 1.2, 436 g/L, 12 M) over 2 h to crystallize the product.
6. Distill (Azeotropic of iPrOH and water: bp = 80.3 °C, 12 wt % water,) to remove 600 ml of the solvent (d = 0.905) over 5 h, reducing the volume to about 400 ml.<sup>4</sup>
7. Cool the mixture to 25 °C over 3 h, followed by filtration to isolate the product **15**. The quantity is 90.6 g, corresponding to 90% yield. The ee is > 99%.

| Input                            |                       |          |         |                         |       |          |          |          |          |
|----------------------------------|-----------------------|----------|---------|-------------------------|-------|----------|----------|----------|----------|
| Chemical                         | Concentration (w/w %) | Vol (ml) | Density | Weight (g)              | Mw    | mol      | Role     | X/ref. 3 | PMI      |
| Compound 13                      |                       |          |         | 100                     | 293   | 0.34     | Ref. 3   | 1.00     | (2.07)   |
| iPrOH                            |                       |          | 0.8     | 666                     |       |          | Solvent  | 6.66     | 13.76    |
| Compound 14                      |                       |          |         | 0.00129                 | 756   | 1.71E-06 | Catalyst | 1.E-05   | 2.7.E-05 |
| H <sub>2</sub>                   |                       |          |         | 0.682                   | 2     | 0.34     | Reactant | 0.01     | 0.014    |
| Water                            |                       |          |         | 82.5                    |       |          | Solvent  | 0.83     | 1.715    |
| NaOH solution                    | 50%                   |          | 1.52    | 37                      |       |          | Catalyst | 0.37     | 0.764    |
| (Water)                          |                       |          |         | 18.5                    |       |          |          | 0.19     |          |
| (NaOH)                           |                       |          |         | 18.5                    | 40    | 0.46     |          | 0.19     |          |
| Total input                      |                       |          |         | 886                     |       |          |          | 8.86     | 16.2     |
| Theoretical output               |                       |          |         |                         |       |          |          |          |          |
| <b>Expected products</b>         |                       |          |         |                         |       |          |          |          |          |
| Compound 15                      |                       |          |         | 100.68                  | 295   | 0.34     | Product  | 1.01     |          |
| Compound 14                      |                       |          |         | 0.00129                 |       |          | Catalyst | 1.E-05   |          |
| NaOH                             |                       |          |         | 18.5                    |       |          | Catalyst | 0.19     |          |
| <b>Solvents excess reactants</b> |                       |          |         |                         |       |          |          |          |          |
| iPrOH                            |                       |          |         | 666                     |       |          | Solvent  | 6.66     |          |
| Water                            |                       |          |         | 101                     |       |          | Solvent  | 1.01     |          |
| Total output                     |                       |          |         | 886                     |       |          |          | 8.86     |          |
| Work up & isolation              |                       |          |         |                         |       |          |          |          |          |
| HCl solution                     | 37%                   |          | 1.2     | 46                      |       |          |          | 0.46     | 0.9504   |
| (HCl)                            |                       |          |         | 17.02                   | 36.5  | 0.47     |          | (0.17)   |          |
| (Water)                          |                       |          |         | 28.98                   |       |          |          | (0.29)   |          |
| Total                            |                       |          |         | 46                      |       |          |          | 0.46     | 0.95     |
| Actual yield 90%                 |                       |          |         |                         |       |          |          |          |          |
| Compound 15                      |                       |          |         | 90.61                   | 295   | 0.31     | Product  | 0.91     | 1.88     |
| <i>RF</i> <sub>3</sub>           | 1.104                 |          |         | <i>CRF</i> <sub>3</sub> | 2.066 |          |          |          |          |

## Step 4

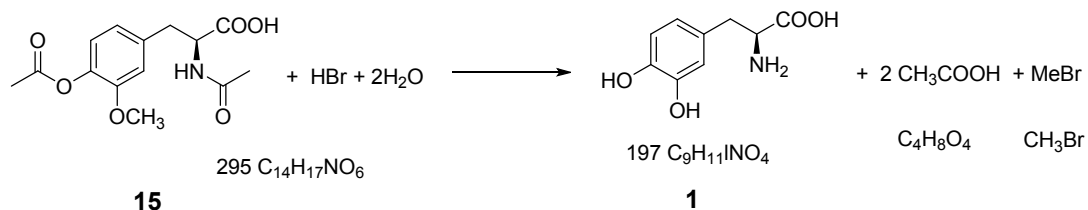

### Description: <sup>5</sup>

1. Add 250 g HBr solution to 89 g of **15** (48%, d=1.49).
2. Heat to 105-110 °C over 2 h and reflux at the temperature for 3 h. Cool the solution to 25 °C over 3 h,
3. Neutralize the solution to pH 3 with NaOH (solution in 90 ml water) over 3 h.
4. Isolate crystalline L-Dopa product by filtration.
5. Re-slurry in water (90 ml) by heating to 90 °C over 1 h and hold at the temperature for 1 h, then cool the temperature to 25 °C over 2 h.
6. Recover the product by filtration.
7. Dry the product under vacuum to obtain 47.5 g final product **1** (0.24 mol, 80% yield).



| Input                             |               |          |         |                        |       |      |                 |         |        |
|-----------------------------------|---------------|----------|---------|------------------------|-------|------|-----------------|---------|--------|
| Chemical                          | Concentration | Vol (ml) | Density | Weight                 | Mw    | mol  | Role            | X/Ref 4 | PMI    |
| Compound 15                       |               |          |         | 89                     | 295   | 0.30 | Ref 4           | 1.00    | (1.87) |
| HBr solution                      | 48%           |          | 1.49    | 250                    |       |      |                 | 2.81    | 5.26   |
| (HBr)                             |               |          |         | 120                    | 81    | 1.48 | Reactant        | (1.35)  | (2.52) |
| (Water)                           |               |          |         | 130                    | 18    | 7.22 | Reactant        | (1.461) | (2.73) |
| Total input                       |               |          |         | 339.00                 |       |      |                 | 3.81    | 5.26   |
| Theoretical output                |               |          |         |                        |       |      |                 |         |        |
| <b>Expected products</b>          |               |          |         |                        |       |      |                 |         |        |
| L-Dopa 1                          |               |          |         | 59.43                  | 197   | 0.30 | Product         | 0.67    |        |
| Acetic acid                       |               |          |         | 36.20                  | 60    | 0.60 | by product      | 0.41    |        |
| MeBr                              |               |          |         | 28.66                  | 95    | 0.30 | by product      | 0.32    |        |
| <b>Solvents, excess reactants</b> |               |          |         |                        |       |      |                 |         |        |
| HBr                               |               |          |         | 95.56                  | 81    | 1.18 | Excess reactant | 1.07    |        |
| Water                             |               |          |         | 119.14                 | 18    | 6.62 | Excess reactant | 1.34    |        |
| Total output                      |               |          |         | 339.00                 |       |      |                 | 3.81    |        |
| Work up & isolation               |               |          |         |                        |       |      |                 |         |        |
| NaOH                              |               |          |         | 48                     | 40    | 1.2  | neutralize      | 0.54    | 1.01   |
| Water                             |               |          |         | 180                    |       |      |                 | 2.02    | 3.78   |
| total                             |               |          |         | 228                    |       |      |                 | 2.56    | 4.79   |
| Actual yield 80%                  |               |          |         |                        |       |      |                 |         |        |
| L-Dopa 1                          |               |          |         | 47.55                  | 197   | 0.24 | Product         | 0.534   | 1.00   |
| <i>RF<sub>4</sub></i>             | 1.872         |          |         | <i>CRF<sub>4</sub></i> | 1.872 |      |                 |         |        |

#### Step 4-1 Removal of MeBr by a scrubber

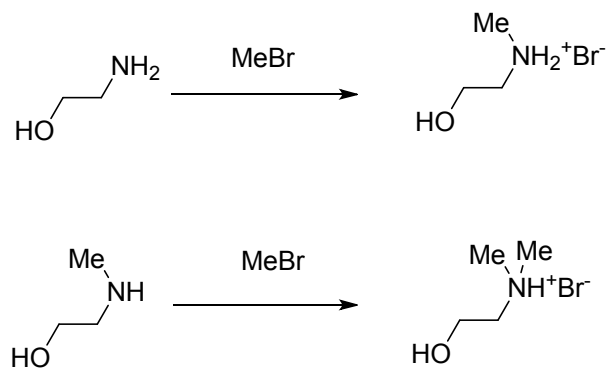

### Description<sup>6</sup>

1. The MeBr byproduct from Step 4 is introduced in to the scrubber containing aqueous solution of 17.5wt % Ethanolamine.
2. After Reaction 4 completes, the scrubbing reaction continues for additional 2 h while the residual MeBr in Reaction 4 is purged by nitrogen.
3. The removal efficiency is 99.9%.

| Input                                                   |          |                |                             |        |       |                   |          |         |
|---------------------------------------------------------|----------|----------------|-----------------------------|--------|-------|-------------------|----------|---------|
| Chemical                                                | Vol (ml) | Density (g/ml) | Weight (g)                  | Mw     | mol   | Role              | X/ref. 4 | PMI     |
| MeBr from Step 4                                        |          |                | 28.66                       | 95.00  | 0.30  | Step 4 by product | 0.32     | (0.599) |
| Ethanolamine                                            |          |                | 497.71                      | 61.10  | 8.15  | Reactant          | 5.59     | 10.46   |
| Water                                                   |          |                | 2340.46                     | 18.00  |       | Solvent           | 26.30    | 49.23   |
| Total input                                             |          |                | 2866.83                     |        |       |                   | 32.21    | 59.69   |
| Theoretical output                                      |          |                |                             |        |       |                   |          |         |
| MeNH(CH <sub>2</sub> ) <sub>2</sub> OH<br>HBr           |          |                | 42.36                       | 156.00 | 0.27  | product           | 0.48     |         |
| Me <sub>2</sub> N(CH <sub>2</sub> ) <sub>2</sub> OH HBr |          |                | 5.13                        | 170.00 | 0.03  | product           | 0.06     |         |
| NH <sub>2</sub> (CH <sub>2</sub> ) <sub>2</sub> OH      |          |                | 478.49                      | 61.00  | 7.84  | excess reactant   | 5.38     |         |
| Water                                                   |          |                | 2340.46                     |        |       | Solvent           | 26.30    |         |
| Total output                                            |          |                | 2866.43                     |        |       |                   | 32.21    |         |
| $RF_{4-1} = RF_4$                                       | 1.872    |                | $CRF_{4-1} = RF_4 \times 1$ |        | 1.872 |                   |          |         |

### PMI summary

| Step  | RF    | CRF  | Reactant | Catalyst | Solvent | Isolation | Total |
|-------|-------|------|----------|----------|---------|-----------|-------|
| 1     | 0.801 | 1.64 | 6.75     | 0.11     | 0.00    | 2.16      | 9.0   |
| 2     | 0.988 | 2.04 | 2.04     | 0.00     | 6.12    | 0.00      | 8.2   |
| 3     | 1.104 | 2.06 | 0.02     | 0.76     | 15.48   | 0.95      | 17.2  |
| 4     | 1.872 | 1.87 | 5.26     | 0.00     | 0.00    | 4.79      | 10.1  |
| 4-1   | 1.872 | 1.87 | 10.46    | 0.00     | 49.23   | 0.00      | 59.7  |
| Total |       |      | 24.53    | 0.88     | 70.83   | 7.90      | 104   |

*Reference:*

1. W. S. Knowles, M. L. Sabacky and B. D. Vineyard, Monsanto Co. GB1351911, 1974
2. K. N. F. Shaw, A. McMillan and M. D. Armstrong, *J. Am. Chem. Soc.* 1958 **23**, 27-32 (for yield correction from 45% to 69%)
3. W. S. Knowles, M. L. Sabacky, and B. D. Vineyard, Monsanto Co. US 4008281 1977,
4. L. H. Horseley, *Azeotropic data – III*, ed, R. F. Gould, American Chemical Society, Washington D. C.; **1973**; pp 18
5. Assuming deprotection yield 85%, and lose 5% after two washes. T. W. Green, and P. G. M. Wuts, in *Protective Groups in Organic Synthesis*, 2<sup>nd</sup> ed. Wiley, New York, **1991**, pp 146-148.
6. The amounts of chemicals are based on a pilot test results (Table 3, entry 4) of K. Hettenback, D. J. am Ende, K. Leeman, E. Dias, N. Kasthurikrishnan, S. J. Brenek and P. Ahlijanian, *Org. Process Res. Dev.* 2002, **6**, 407-415

## Flow diagram of the Monsanto Process to manufacture 100 kg L-Dopa

| Monsanto Process Flow Diagram Step 1 |     |   |                                          |     |                              |                    |                     | Isolation yield | 0.69 |
|--------------------------------------|-----|---|------------------------------------------|-----|------------------------------|--------------------|---------------------|-----------------|------|
|                                      | Kg  |   |                                          |     | Waste (Kg)                   | Reaction time (h)  |                     |                 |      |
| <b>Compound 5</b>                    | 163 |   | Erlenmeyer reaction<br>95 °C, filtration | 1-1 |                              |                    | <b>Stream 1-1</b>   | Weight (kg)     | kMol |
| <b>Acetic anhydride</b>              | 432 | → |                                          | →   | 391                          | 2                  | (NaOH)              |                 | 0.27 |
| <b>Glycine</b>                       | 81  |   |                                          |     |                              |                    | (AcOH)              |                 | 4.30 |
| <b>NaOH</b>                          | 11  |   |                                          | ↓   |                              |                    | (H <sub>2</sub> O)  |                 | 1.08 |
|                                      |     |   |                                          |     |                              |                    | (Ac <sub>2</sub> O) |                 | 1.00 |
|                                      |     |   | Rinse, Dry                               | 1-2 |                              |                    | NaOAc               | 22              | 0.27 |
| <b>Acetic acid</b>                   | 215 | → |                                          | →   | 307                          |                    | Water               | 6               | 0.34 |
|                                      |     |   |                                          |     |                              |                    | AcOH                | 363             | 6.04 |
|                                      |     |   |                                          |     |                              |                    | <b>Stream 1-2</b>   |                 |      |
| <b>Reaction input</b>                | 686 |   | Compound 12                              |     |                              |                    | AcOH                | 215             |      |
| <b>Isolation input</b>               | 215 |   |                                          | 1-3 |                              |                    | Un-isolated 12      | 92              | 0.33 |
|                                      |     |   |                                          |     | <b>Estimated total waste</b> | <b>Total Waste</b> |                     |                 |      |
| <b>Step total</b>                    | 901 |   | 204                                      |     | 697                          | 697                |                     |                 |      |

| Monsanto Process Flow Diagram Step 2 |      |   |                                                        |            |            |                              | Isolation yield    | 0.95        |       |
|--------------------------------------|------|---|--------------------------------------------------------|------------|------------|------------------------------|--------------------|-------------|-------|
|                                      | Kg   |   |                                                        |            | Waste (Kg) | Reaction time (h)            |                    |             |       |
| <b>Compound 12</b>                   | 204  |   | Hydrolysis 65 °C,<br>remove acetone by<br>distillation | <b>2-1</b> |            |                              | <b>Stream 2-1</b>  | Weight (kg) | kMol  |
| <b>Acetone</b>                       | 612  | → |                                                        | →          | 612        | 4                            | Acetone            | 612         |       |
| <b>Water</b>                         | 204  |   |                                                        |            |            |                              |                    |             |       |
|                                      |      |   | ↓                                                      |            |            |                              | <b>Stream 2-2</b>  |             |       |
|                                      |      |   | Filtration                                             | <b>2-2</b> |            |                              | Water              | 191         | 10.60 |
|                                      |      |   |                                                        | →          | 201        |                              | Un-isolated 13     | 10          | 0.04  |
|                                      |      |   | ↓                                                      |            |            |                              |                    |             |       |
| <b>Reaction input</b>                | 1020 |   | <b>Compound 13</b>                                     | <b>2-3</b> |            |                              |                    |             |       |
|                                      |      |   |                                                        |            |            | <b>Estimated total waste</b> | <b>Waste total</b> |             |       |
| <b>Step input</b>                    | 1020 |   | 207                                                    |            | 814        | 813                          |                    |             |       |

| Monsanto Process Flow Diagram Step 3 |        |   |                                   |            |                   |                   | Isolation yield | 0.9  |  |
|--------------------------------------|--------|---|-----------------------------------|------------|-------------------|-------------------|-----------------|------|--|
|                                      | kg     |   |                                   | Waste (kg) | Reaction time (h) |                   |                 |      |  |
| <b>Compound 13</b>                   | 207    |   | Hydrogenation<br>50 °C            |            |                   | <b>Stream 3-1</b> | Wt (kg)         | kmol |  |
| iPrOH                                | 1376   | → |                                   |            | 1                 | iPrOH             | 987             |      |  |
| Water                                | 171    |   |                                   |            |                   | Water             | 135             |      |  |
| 50% NaOH                             | 76     |   |                                   |            |                   |                   |                 |      |  |
| hydrogen                             | 1.41   |   |                                   |            |                   |                   |                 |      |  |
| <b>Catalyst 14</b>                   | 0.0027 |   |                                   |            |                   | <b>Stream 3-2</b> |                 |      |  |
|                                      |        |   |                                   |            |                   | NaCl              | 55.89           | 0.96 |  |
|                                      |        |   |                                   |            |                   | Catalyst 14       | 0.0027          |      |  |
|                                      |        |   |                                   |            |                   | Water             | 152.13          |      |  |
|                                      |        |   | Neutralization<br>Crystallization |            |                   | iPrOH             | 389             |      |  |
| 37% HCl                              | 95.0   | → |                                   |            |                   | Un-isolated 15    | 21              | 0.07 |  |
|                                      |        |   |                                   |            |                   |                   |                 |      |  |
|                                      |        |   | Distillation<br>85 °C             |            |                   |                   |                 |      |  |
|                                      |        |   |                                   |            | 3-1               |                   |                 |      |  |
|                                      |        |   |                                   |            | →                 | 1122              | 5               |      |  |
|                                      |        |   |                                   |            |                   |                   |                 |      |  |

Continue from the last page

|                        |      |  |             |     |                              |                    |  |  |  |
|------------------------|------|--|-------------|-----|------------------------------|--------------------|--|--|--|
|                        |      |  |             |     |                              |                    |  |  |  |
|                        |      |  | ↓           |     |                              |                    |  |  |  |
|                        |      |  | Filtration  | 3-2 |                              |                    |  |  |  |
|                        |      |  |             | →   |                              | 618                |  |  |  |
|                        |      |  | ↓           |     |                              |                    |  |  |  |
| <b>Reaction input</b>  | 1832 |  | Compound 15 |     |                              |                    |  |  |  |
| <b>Isolation input</b> | 95.0 |  |             | 3-3 | <b>Estimated total waste</b> | <b>Waste total</b> |  |  |  |
| <b>Step total</b>      | 1927 |  | 187.2       | kg  | 1739                         | 1739               |  |  |  |

| Monsanto Process Flow Diagram Step 4 |      |   |                                   |            |                  |                   | Yield         | 0.8  |
|--------------------------------------|------|---|-----------------------------------|------------|------------------|-------------------|---------------|------|
|                                      | kg   |   |                                   | Waste (Kg) | Reaction time    | Stream 4-1        | Wt (kg)       | kmol |
| Compound 15                          | 187  |   | Deprotection<br>Reflux 110 °C     | 4-1        |                  | MeBr              | 60.28         | 0.63 |
| 48% HBr                              | 526  | → |                                   | →          | 60.28            | 3                 |               |      |
|                                      |      |   |                                   |            |                  | <b>Stream 4-2</b> | Wt            | mol  |
|                                      |      |   | ↓                                 |            |                  | NaBr              | 256           | 2.48 |
| NaOH                                 | 101  | → | Neutralization<br>Crystallization |            |                  | AcOH              | 76            | 1.27 |
| Water                                | 189  |   |                                   |            |                  |                   | Water         | 486  |
|                                      |      |   | ↓                                 |            |                  | <b>Stream 4-3</b> | Wt            | mol  |
|                                      |      |   | Filtration                        | 4-2        |                  | Water             | 189           |      |
|                                      |      |   |                                   | →          | 818              |                   | Un-isolated 1 | 25   |
|                                      |      |   | ↓                                 |            |                  |                   |               |      |
| Water                                | 189  | → | Reslurry at 90 °C                 |            | 1                |                   |               |      |
|                                      |      |   | ↓                                 |            |                  |                   |               |      |
|                                      |      |   | Filtration                        | 4-3        |                  |                   |               |      |
|                                      |      |   |                                   | →          | 214              |                   |               |      |
|                                      |      |   | ↓                                 |            |                  |                   |               |      |
| Reaction input                       | 713  |   | L-Dopa Product                    |            |                  |                   |               |      |
| Isolation input                      | 480  |   |                                   |            |                  |                   |               |      |
|                                      |      |   |                                   | 4-4        | Est. Total Waste | Waste total       |               |      |
| Step Total                           | 1193 |   | 100                               | kg         | 1093             | 1092              |               |      |



| Step 4-1 MeBr Removal (from Step 4) |             |   |           |   |                    | Removal           | 0.999                                                   |             |       |
|-------------------------------------|-------------|---|-----------|---|--------------------|-------------------|---------------------------------------------------------|-------------|-------|
|                                     | kg          |   |           |   | Waste (Kg)         | Reaction time (h) |                                                         |             |       |
| <b>MeBr</b>                         | <b>60</b>   |   | Scrubbing |   |                    |                   | <b>Stream 4-5</b>                                       | Weight( kg) | kMol  |
| <b>Ethanolamine</b>                 | 1046        | → |           | → | <b>4-5</b>         | 3                 | MeNH(CH <sub>2</sub> ) <sub>2</sub> OH HBr              | 89          | 0.57  |
| <b>Water</b>                        | 4923        |   |           |   |                    |                   | Me <sub>2</sub> N(CH <sub>2</sub> ) <sub>2</sub> OH HBr | 11          | 0.06  |
|                                     |             |   |           |   | <b>Total Waste</b> |                   | Ethanolamine                                            | 1008        | 16.52 |
| <b>Total input</b>                  | <b>6030</b> |   |           |   | <b>6030</b>        |                   | Water                                                   | 4923        |       |

## The Ajinomoto Process

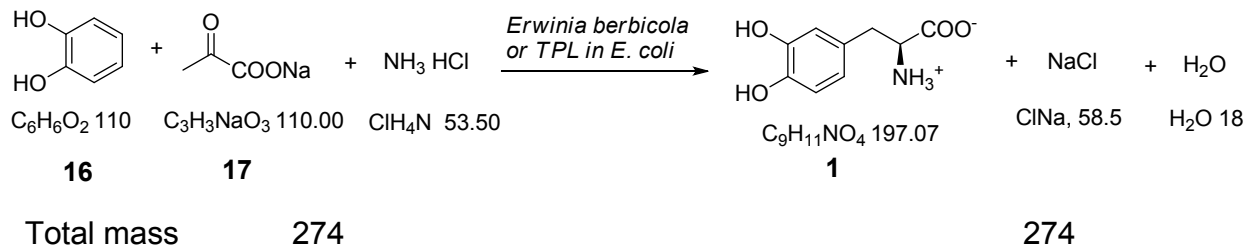

| Reaction     | Input              | Output        | Mw  | Equivalent | Mass       |
|--------------|--------------------|---------------|-----|------------|------------|
| 1            | <b>16</b>          |               | 110 | 1          | 110        |
|              | <b>17</b>          |               | 110 | 1          | 110        |
|              | NH <sub>4</sub> Cl |               | 54  | 1          | 54         |
| Total input  |                    |               |     | 1          | 274        |
|              |                    | <b>L-Dopa</b> | 197 |            | <b>197</b> |
| Atom Economy | 0.719              |               |     |            |            |

### Lab protocol for the Ajinomoto process

#### Outline:

1. Tyrosine Phenyl Lyase (TPL) is produced by high density fermentation of a strain of *E. coli* that over expresses TPL. The cells are isolated by Disk Stack Centrifuge after medium exchange with diafiltration.
2. The cleaned cells are used directly in the synthesis of L-Dopa from catechol, pyruvate, and ammonia.
3. Product L-Dopa is isolated from the mixture with centrifuge decanter.
4. Product is purified by re-crystallization under basic condition after discoloration with activated carbon.

## Synthesis of L-Dopa<sup>1-3</sup>

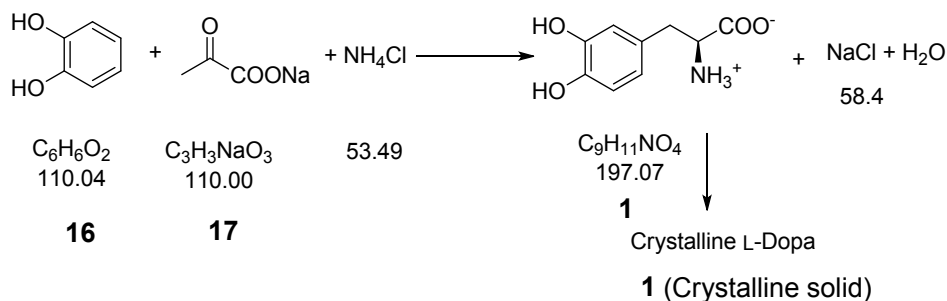

### Procedure

1. Dissolve Sodium pyruvate (12.43 kg) in water (739 kg), charge NH<sub>4</sub>Cl (41.45 kg), Na<sub>2</sub>EDTA 2H<sub>2</sub>O (2.49 kg), adjust the pH to 8.0. Cool the reaction mixture to 15 °C.
2. Start the reaction by adding the biocatalyst (75 kg wet cells), sodium bisulfite (1.66 kg), and catechol (8.29 kg) to the reaction mixture. Maintain the temperature at 15 °C, and pH at 8.0. Continue the agitation for 2 h.
3. Prepare the feed solution by dissolving sodium pyruvate (61.73 kg) and catechol (61.73 kg) in water (271 kg). Cool to 15 °C and adjust the pH to 8.0.
4. Add anhydrous L-dopa seed to the reaction mixture (7.65 kg), agitate for 1 h.
5. Add the feed solution (308 L) to the reaction mixture over 12 h. Continue agitation for 3 h to finish.
6. Product isolation: Separate the crystalline L-Dopa from cells and solution with decanter centrifuge after pH adjustment. Product: 171 kg wet cake, with 70% active (120 kg, yield at this point = 90%)
7. Product discoloration: Mix the wet cake with 418 kg water, adjust pH to 11.5 with 5 N sodium hydroxide (approx. 135 L) to dissolve L-Dopa. Add 6.4 kg of activated carbon to the solution, heat to 50 °C and agitate for 2 h. Filter to remove the insoluble.
8. Reactive crystallization: Cool the solution to 25 °C, Seed with 1 mol % (with catechol as reference) L-Dopa. Add 6N HCl (total about 113 L) at 25 °C over 6 h to crystallize L-Dopa product. The final pH is at 5.7.
9. Isolate the crystalline solid by filtration. Dry under vacuum to remove residual water. The product is 109 Kg (or 100 kg excluding seeds), representing 80% yield.<sup>4</sup>

Streams in reaction:<sup>3</sup>

| Reactant stream                | Volume Ratio | Chemical                               | Wt Concentration (g/L) | Mw   | Molar concentration (mol/L) |
|--------------------------------|--------------|----------------------------------------|------------------------|------|-----------------------------|
| Initial stream                 | 1            | Catechol                               | 10                     | 110  | 0.091                       |
|                                |              | Sodium pyruvate                        | 15                     | 110  | 0.136                       |
|                                |              | NH <sub>4</sub> Cl                     | 50                     | 53.5 | 0.935                       |
|                                |              | NaHSO <sub>3</sub>                     | 2                      | 104  | 0.019                       |
|                                |              | Na <sub>2</sub> EDTA 2H <sub>2</sub> O | 3                      | 372  | 0.008                       |
|                                |              | TPL                                    | 75                     |      |                             |
| Seed (added to initial stream) |              | L-Dopa                                 | 9.3                    | 197  |                             |
| Feed solution                  | 0.372        | Sodium pyruvate                        | 200                    | 110  | 1.818                       |
|                                |              | Catechol                               | 200                    | 110  | 1.818                       |

| Input                                  |         |              |             |                         |         |                    |          |         |
|----------------------------------------|---------|--------------|-------------|-------------------------|---------|--------------------|----------|---------|
| Chemical                               | Vol (L) | Density g/ml | Weight (kg) | Mw                      | mol     | Role               | X/ref. 1 | PMI     |
| (Catechol, initial)                    |         |              | (8.29)      | 110                     | 75.4    | Reactant           | (0.12)   | (0.084) |
| (Na pyruvate initial)                  |         |              | (12.43)     | 110                     | 113.0   | Reactant           | (0.18)   | (0.126) |
| (Water)                                |         |              | (739)       | 18                      | 41055.6 | Solvent            | (10.55)  | (7.39)  |
| NH <sub>4</sub> Cl                     |         |              | 41.45       | 53.5                    | 774.8   | Reactant           | 0.59     | 0.413   |
| Na <sub>2</sub> EDTA 2H <sub>2</sub> O |         |              | 2.49        | 372                     | 6.7     | chelation          | 0.04     | 0.027   |
| TPL                                    |         |              | 75          |                         |         | Catalyst           | (1.07)   | (0.75)  |
| NaHSO <sub>3</sub>                     |         |              | 1.66        | 104                     | 16.0    | Antioxidant        | 0.02     | 0.015   |
| (Sodium pyruvate, feed)                |         |              | (61.73)     | 110                     | 561.2   | Reactant           | (0.88)   | (0.616) |
| (Catechol, feed)                       |         |              | (61.73)     | 110                     | 561.2   | Reactant           | (0.88)   | (0.616) |
| (Water)                                |         |              | (271)       | 18                      | 15055.6 | Solvent            | (3.87)   | (2.71)  |
| L-Dopa seed                            |         |              | 7.65        | 197                     | 38.8    | Seed               | 0.11     | 0.077   |
| Water, total                           |         |              | 1010        | 18                      | 56111.1 | Solvent            | 14.42    | 10.1    |
| Catechol, total                        |         |              | 70.02       | 110                     | 636.5   | <b>Ref 1</b>       | 1.00     | 0.7     |
| Sodium pyruvate total                  |         |              | 74.16       | 110                     | 674.2   | reactant           | 1.06     | 0.742   |
| Input total                            |         |              | 1282        |                         |         |                    | 18.32    | 12.07   |
| Theoretical output                     |         |              |             |                         |         |                    |          |         |
| <b>Expected product</b>                |         |              |             |                         |         |                    |          |         |
| L-Dopa                                 |         |              | 133.0       | 197                     | 675.4   | Product            | 1.90     |         |
| Sodium chloride                        |         |              | 37.2        | 58.5                    | 636.5   | by product         | 0.53     |         |
| Water                                  |         |              | 11.7        | 18                      | 649.9   | Solvent/by product | 0.16     |         |
| <b>Solvent, excess</b>                 |         |              |             |                         |         |                    |          |         |
| Water                                  |         |              | 1010.0      | 18                      | 56111.1 |                    | 14.42    |         |
| Na <sub>2</sub> EDTA                   |         |              | 2.2         | 336                     | 6.7     | Chelation          | 0.03     |         |
| TPL (wet cell)                         |         |              | 75.0        |                         |         | Catalyst           | 1.07     |         |
| NaHSO <sub>3</sub>                     |         |              | 1.7         | 104                     | 16.0    | Antioxidant        | 0.02     |         |
| NH <sub>4</sub> Cl                     |         |              | 7.4         | 53.5                    | 138.2   | Excess by product  | 0.11     |         |
| Sodium pyruvate                        |         |              | 4.1         | 110                     | 37.6    | Excess by product  | 0.06     |         |
| Total                                  |         |              | 1282        |                         |         |                    | 18.32    |         |
| Work up & isolation                    |         |              |             |                         |         |                    |          |         |
| Water                                  |         |              | 418         |                         |         |                    | 5.96     | 4.18    |
| 5 N NaOH solution                      | 135     | 1.18         | 159         |                         |         |                    | 2.28     | 1.60    |
| (NaOH)                                 |         |              | 27.0        | 40                      | 675.4   |                    | 0.39     | (0.273) |
| (Water)                                |         |              | 132         |                         |         |                    | 1.89     | (1.32)  |
| Activated Carbon                       |         |              | 6.4         |                         |         |                    | 0.09     | 0.063   |
| 6 N HCl                                | 112.5   | 1.09         | 122.69      |                         |         |                    | 1.75     | 1.23    |
| (HCl)                                  |         |              | 24.65       | 36.5                    | 675.4   |                    | 0.35     | (0.245) |
| (Water)                                |         |              | 98.04       |                         |         |                    | 1.40     | (0.98)  |
| L-Dopa seed                            |         |              | 1.25        | 197                     | 6.4     | mol/ref 1 = 0.01   | 0.02     | 0.014   |
| Total                                  |         |              | 707.27      |                         |         |                    | 10.10    | 7.09    |
| Actual yield 79.75%                    |         |              |             |                         |         |                    |          |         |
| L-Dopa                                 |         |              | 109         | 197                     | 552.8   |                    | 1.56     |         |
| Net (excluding seeding)                |         |              | 100         | 197                     | 507.6   |                    | 1.43     |         |
| <i>RF</i> <sub>1</sub>                 | 0.700   |              |             | <i>CRF</i> <sub>1</sub> | 0.700   |                    |          |         |

## Tyrosine phenol lyase preparation by high density fermentation<sup>5</sup>

1. Pick a single colony of the production strain from LB/antibiotic plate; inoculate to 50 ml (54 g) of semi-synthetic medium (SM-B) medium. Incubate at 37 °C for 16 h to reach  $OD_{600} \geq 1.5$  (about 0.45 g dry cell weight or DCW /L or  $1.5 \times 10^9$  cell/ml)
2. To prepare secondary seed, transplant the primary culture to 25 L (27 kg) SM-B, incubate at 37 °C for 16 h to reach  $OD_{600} > 10$  (3 g DCW/L).
3. Transfer the secondary seed to 415 L (448 kg) of the main culture (SM-B medium, glucose 20 g/L), incubate at 37 °C for 8 h to reach  $OD_{600} > 30$  (10 g DCW/L), or when growth slows down as indicated by the increase of  $pO_2$
4. Start adding feed medium (FM) based on an exponential feeding strategy with growth rate  $\mu = 0.15$ ,<sup>4</sup>  $OD_{600}$  is expected to reach  $> 67$  (20 g DCW/L) in 4 h, add IPTG (1 mol or 240 g, final concentration 2 mM) to induce the expression of TPL.
5. Continue adding FM for the rest of 8 Hours, over which the  $OD_{600}$  is expected to reach  $\sim 150$ , corresponding to cell weight of 50 g DCW/L. In total, 60 L (84.6 kg) of feed medium is added to the fermenter, giving the final volume to 500 L.<sup>6,7</sup>
6. Productivity: 50 g DCW (167 wet cell)/L, with 15% of the soluble protein is the desired enzyme. The total amount of wet cell is 83.5 kg.
7. Exchange the culture medium with 1500 L 5mM phosphate, pH 7 Buffer by diafiltration.  
8
8. Isolate cells by disc-stack centrifuge. The recovery of cells is  $> 90\%$ .
9. Total catalyst:  $83.5 \times 0.9 = 75$  kg wet cell (22.5 kg DCW), with 1.8 kg of desired TPL.

| Input                                    |         |         |             |                          |      |                 |          |         |
|------------------------------------------|---------|---------|-------------|--------------------------|------|-----------------|----------|---------|
| Chemical                                 | Vol (L) | Density | Weight (kg) | Mw                       | mol  | Role            | X/ref. 2 | PMI     |
| (SM-B medium)                            | 440     | 1.08    | 475.2       |                          |      | Starting medium | 6.34     | (4.76)  |
| (Feed medium)                            | 60      | 1.41    | 84.6        |                          |      | Feed medium     | 1.13     | (0.848) |
| IPTG                                     |         |         | 0.24        | 238                      | 1.0  | Inducer         | 0.003    | 0.00225 |
| 29% NH <sub>4</sub> OH                   | 13.3    | 0.897   | 12          |                          | 164  | N source, base  | 0.16     | 0.12    |
| Total media                              | 513     |         | 572         |                          |      |                 | 7.46     | 5.60    |
| Output                                   |         |         |             |                          |      |                 |          |         |
| TPL/wet cell                             |         |         | 83.5        |                          |      | Biocatalyst     | 1.11     |         |
| (DCW)                                    |         |         | 25          |                          |      |                 | 0.33     |         |
| (water in wet cell)                      |         |         | 58.5        |                          |      |                 | 0.78     |         |
| Fermentation waste                       |         |         | 476         |                          |      |                 | 6.35     |         |
| Work up & isolation                      |         |         |             |                          |      |                 |          |         |
| 1500 L 10 mM phosphate pH 7              |         |         |             |                          |      |                 |          |         |
| (Water)                                  |         |         | 1500        |                          |      |                 | 20.00    | 15      |
| 1.25 g/L K <sub>2</sub> HPO <sub>4</sub> | 136.1   |         | 1.875       |                          | 14   |                 | 0.025    | 0.019   |
| 0.05 g/L KH <sub>2</sub> PO <sub>4</sub> | 174.2   |         | 0.075       |                          | 0.4  |                 | 0.001    | 0.00075 |
| Total                                    |         |         | 1502        |                          |      |                 | 20.03    | 15.02   |
| Actual yield                             |         |         |             |                          |      |                 |          |         |
| Wet cell                                 |         |         | 75          |                          |      | <b>Ref 2</b>    | 1.00     | 0.75    |
| <i>RF</i> <sub>11</sub>                  | 1.00    |         |             | <i>CRF</i> <sub>11</sub> | 0.75 |                 |          |         |

### Summary of PMI

| Contributor                                | PMI  |
|--------------------------------------------|------|
| Reactants                                  | 1.9  |
| Water, Other auxiliaries (EDTA, bisulfite) | 10.2 |
| Biocatalyst preparation                    | 20.6 |
| Product isolation                          | 7.1  |
| Total                                      | 39.7 |

### References

- The list of the patents from Ajinomoto for L-Dopa manufacture by tyrosine phenyl lyase route:
  - H. Ei, K. Yamashita, S. Okumura and H. Yamada, Ajinomoto Co., Inc., JP48016194B, 1973; (b) G. Eiji and I. Masaru, Ajinomoto Co., Inc., Japan, JP56051991A, 1981; (c) H. Enei, H. Nakazawa, H. Matsui, O. Kanagawa, H. Yamada and K. Ogata, Ajinomoto Co., Inc. Japan, DE2152548A, 1972; (d) M. Ishida, K. Fujiwara, M. Okazaki and M. Ozaki, Ajinomoto Co., Inc. Japan, JP48028446A, 1973; (e) M. Ishida, K. Fujiwara, M. Okazaki and M. Tanaka, Ajinomoto Co., Inc. Japan, JP48026745A, 1973; (f) T. Kotani, K. Lizumi and M. Takeuchi, Ajinomoto Co.,

- Inc. Japan, EP636695A1, 1995; (g) H. Kumagai, H. Suzuki, T. Katayama, M. Nawata, and H. Nakazawa, Ajinomoto Co., Inc. EP1582529A1, 2005; (h) H. Kumagaya, H. Suzuki and T. Katayama, Ajinomoto Co., Inc. JP11313672A, 1999; (i) H. Kumagaya, H. Suzuki and T. Katayama, Ajinomoto Co., Inc. JP2001238678A, 2001; (j) T. Miyasawa, I. Sasaji, T. Yaya, K. Toi, T. Uzuki and N. Sato, Ajinomoto Co., Inc., JP49041188B, 1974; (k) K. Ogata, H. Yamada, H. Ei, and S. Okumura, Ajinomoto Co., Inc., JP47044636B4, 1972; (l) K. Ogata, H. Yamada, H. Ei, and S. Okumura, Ajinomoto Co., Inc., JP51009394B, 1976; (m) K. Ogata, H. Yamada, H. Enei and S. Okumura, Ajinomoto Co., Inc., DE1960524A, 1970; (n) K. Ogata, H. Yamada, H. Enei and S. Okumura, Ajinomoto Co., Inc., US3791924A, 1974; (o) K. Ogata, H. Yamada, H. Enei, and S. Okumura, Ajinomoto Co., Inc., JP50140677A, 1975; (p) K. Ogata, H. Yamada, H. Enei, and S. Okumura, Ajinomoto Co., Inc., JP49013986B, 1974; (q) T. Tsuchida, Y. Nishimoto, T. Kotani, and K. Iizumi, Ajinomoto Co., Inc., JP05123177A, 1993; (r) A. Yamamoto, K. Yokozeki and K. Kubota, Ajinomoto Co., Inc., JP01010995A, 1989; (s) K. Yokozeki, H. Takeuchi, and Y. Hirose, Ajinomoto Co., Inc., JP61257193A, 1986
- Reviews of Ajinomoto process: H. Enei and Y. Hideaki, *Prog. Ind. Microbiol.* 1986, **24**, 280-5.; T. Katayama and H. Kumagai, in *Encyclopedia of Industrial Biotechnology*, Vol. 3, ed. M. C. Flickinger, John Wiley & Sons, Inc. Hoboken, New Jersey, USA, 2010. pp 1937-1940
  - Ratio and volume of initial solution and feeding solution:

Final concentration of L-Dopa = 110 g/L, corresponding to 0.56 mol L<sup>-1</sup>.

Total amount of L-Dopa product in solution:

Catechol concentration of initial solution = 0.091 mol L<sup>-1</sup>

Catechol concentration in feeding solution = 1.82 mol L<sup>-1</sup>

$$\frac{0.091 \times a + 1.82 \times b}{a + b} = 0.56, \text{ Therefore, } b = 0.372 a$$

Where  $a$  is the volume of initial solution, and  $b$  is the volume of feeding solution.

- Yield of L-Dopa product, and estimate the amount of reference reactant based on the expected amount of product.

$R$ , moles of reference reactant (Catechol)

$P$ , moles of final product (L-Dopa)

$Q$ , moles of product excluding seed

$Y_1$  biocatalytic reaction yield

$Y_2$  Separation yield

$S_1$  molar ratio of seed vs  $R$  in biocatalytic reaction

$S_2$  molar ratio of seed vs  $R$  in recrystallization



$$\text{Theoretical moles of product} = R + S_1R + S_2R$$

Actual yield of product

$$P = Y_2Y_1(R + S_1R) + Y_2S_2R = (Y_2Y_1 + Y_2Y_1S_1 + Y_2S_2)R$$

$$\text{Overall Yield} = \frac{Y_2Y_1(R + S_1R) + Y_2S_2R}{R + S_1R + S_2R} = \frac{Y_2Y_1(1 + S_1) + Y_2S_2}{1 + S_1 + S_2}$$

$$Q = P - S_1R - S_2R = Y_2Y_1(R + S_1R) + Y_2S_2R - S_1R - S_2R$$

$$\text{Simplify } Q = (Y_2Y_1 + Y_2Y_1S_1 + Y_2S_2 - S_1 - S_2)R$$

Therefore:

$$R = \frac{Q}{(Y_2Y_1 + Y_2Y_1S_1 + Y_2S_2 - S_1 - S_2)}$$

5. The protocol is based on fed-batch fermentation with semi-synthetic medium. X. Pei, Q. Wang, X. Qiu, L. Ying, J. Tao and T. Xie, T. *Appl. Biochem.* 2010, **162**, 1423-1434, *ibid*, 2011, **165**:416-425
6. Determine the volumes of initial and feed media

- Determine glucose requirement based on concentration of dry cell weight (DCW/L)

$$\text{Final concentration } X = 50 \text{ g DCW/L, Growth Yield with Glucose } \frac{Y_X}{S} = 0.55$$

$$\text{Final concentration of glucose in the medium } S = 50/0.55 = 91 \text{ g/L}$$

- Determine the ratio of main culture medium vs feed medium:

$$\text{Glucose concentration: initial medium} = 20 \text{ g/L, feed medium} = 600 \text{ g/L}$$

In final fermentation mixture

$$a = \% \text{ Volume of main culture medium, } b = \% \text{ of Volume of feed medium,}$$

$$600b + 20a = 91, \text{ and } a = 1 - b.$$

$$91 = (1 - b)20 + 600b, \text{ Solve the equation: } b = 0.122, a = 0.878. \text{ Or } a:b = 1:0.139$$

- Determine the volumes of the media (Wet cell weight = DCW/0.3)

Total volume =

$$\frac{\text{Amount of catalyst (DCW)}}{X} = \frac{\text{Amount of wet cell}}{X} \frac{10}{3}$$

Volume of initial media =  $0.878 \times \text{Total volume}$ ,

Volume of feed media =  $0.122 \times \text{Total volume}$

## 7. Summary of media

| SM-B medium                                         |            |        |               |
|-----------------------------------------------------|------------|--------|---------------|
| Material                                            | CAS        | Mw     | Content (g/L) |
| Glucose                                             | 50-99-7    | 180.16 | 20            |
| Yeast extract                                       |            |        | 32.3          |
| K <sub>2</sub> HPO <sub>4</sub>                     | 7778-77-0  | 136.1  | 15.3          |
| KH <sub>2</sub> PO <sub>4</sub>                     | 7758-11-4  | 174.2  | 9.7           |
| MgSO <sub>4</sub> ·7H <sub>2</sub> O                | 10034-99-8 | 246.47 | 2.63          |
| EDTANa <sub>2</sub> ·2H <sub>2</sub> O              | 139-33-3   | 372.2  | 0.018         |
| Ampicillin                                          | 69-53-4    | 349.41 | 0.349         |
| CoCl <sub>2</sub> ·6H <sub>2</sub> O                | 7791-13-1  | 237.93 | 0.003172      |
| MnCl <sub>2</sub> ·2H <sub>2</sub> O                | 13446-34-9 | 161.87 | 0.015128      |
| CuCl <sub>2</sub> ·2H <sub>2</sub> O                | 10125-13-0 | 170.48 | 0.001464      |
| H <sub>3</sub> BO <sub>3</sub>                      | 10043-35-3 | 61.83  | 0.002928      |
| Na <sub>2</sub> MoO <sub>4</sub> ·2H <sub>2</sub> O | 10102-40-6 | 241.95 | 0.002684      |
| ZnOAc <sub>2</sub> ·2H <sub>2</sub> O               | 557-34-6   | 219.5  | 0.012688      |
| Fe(III) Citrate                                     | 160105     | 244.95 | 0.098088      |
| Water                                               | 7732-18-5  | 18     | 1000          |

| Feed medium                          |            |        |              |
|--------------------------------------|------------|--------|--------------|
| Material                             | CAS        | Mw     | Content(g/L) |
| Glucose                              | 50-99-7    | 180.16 | 600          |
| MgSO <sub>4</sub> ·7H <sub>2</sub> O | 10034-99-8 | 246.47 | 15.2         |
| Ampicillin                           | 69-53-4    | 349.41 | 0.34941      |
| CoCl <sub>2</sub> ·6H <sub>2</sub> O | 7791-13-1  | 237.93 | 0.09971      |
| MnCl <sub>2</sub> ·2H <sub>2</sub> O | 13446-34-9 | 161.87 | 0.47554      |
| CuCl <sub>2</sub> ·2H <sub>2</sub> O | 10125-13-0 | 170.48 | 0.04602      |
| H <sub>3</sub> BO <sub>3</sub>       | 10043-35-3 | 61.83  | 0.09204      |

|                                                    |            |        |         |
|----------------------------------------------------|------------|--------|---------|
| Na <sub>2</sub> MoO <sub>4</sub> 2H <sub>2</sub> O | 10102-40-6 | 241.95 | 0.08437 |
| ZnOAc <sub>2</sub> 2H <sub>2</sub> O               | 557-34-6   | 219.5  | 0.39884 |
| Fe(III)citrate                                     | 160105     | 244.95 | 3.08334 |
| Water                                              |            |        | 793     |

| Final media (91 g glucose/L final)                 |            |        |              |           |
|----------------------------------------------------|------------|--------|--------------|-----------|
| Material                                           | CAS        | Mw     | Weight (g/L) | kg /500 L |
| Glucose                                            | 50-99-7    | 180.16 | 90.8         | 45.38     |
| Yeast extract                                      |            |        | 28.4         | 14.18     |
| K <sub>2</sub> HPO <sub>4</sub>                    | 7778-77-0  | 136.1  | 13.4         | 6.72      |
| KH <sub>2</sub> PO <sub>4</sub>                    | 7758-11-4  | 174.2  | 8.5          | 4.26      |
| MgSO <sub>4</sub> 7H <sub>2</sub> O                | 10034-99-8 | 246.47 | 4.2          | 2.08      |
| EDTANa <sub>2</sub> 2H <sub>2</sub> O              | 139-33-3   | 372.2  | 0.016        | 0.0079    |
| Ampicillin                                         | 69-53-4    | 349.41 | 0.349        | 0.17      |
| CoCl <sub>2</sub> 6H <sub>2</sub> O                | 7791-13-1  | 237.93 | 0.015        | 0.0075    |
| MnCl <sub>2</sub> 2H <sub>2</sub> O                | 13446-34-9 | 161.87 | 0.071        | 0.036     |
| CuCl <sub>2</sub> 2H <sub>2</sub> O                | 10125-13-0 | 170.48 | 0.0069       | 0.0034    |
| H <sub>3</sub> BO <sub>3</sub>                     | 10043-35-3 | 61.83  | 0.014        | 0.0069    |
| Na <sub>2</sub> MoO <sub>4</sub> 2H <sub>2</sub> O | 10102-40-6 | 241.95 | 0.013        | 0.0063    |
| ZnOAc <sub>2</sub> 2H <sub>2</sub> O               | 557-34-6   | 219.5  | 0.060        | 0.0299    |
| Fe(III) Citrate                                    | 160105     | 244.95 | 0.462        | 0.23      |
| Water                                              | 7732-18-5  | 18     | 975          | 487       |
| IPTG                                               | 367-93-1   | 238.3  | 0.48         | 0.24      |
| 29% NH <sub>4</sub> OH solution (14.8 M)           | 1336-21-6  | 35     | 24           | 12        |
| Total                                              |            |        |              | 573       |

8. (a) F. Lipinski, J. Boelsmand and R. F. Madsen, *Desalination*, 2002, **144**, 179-184, (b) L. Schwartz and K. Seeley, *Introduction to Tangential Flow Filtration for Laboratory and Process Development Applications*, Pall Life Sciences, Ann Arbor, 2002, pp1-13

| Ajinomoto Process Step 1 TPL reaction and Purification |       |   |                                 |            |               | Reaction yield       | 0.9                  | Isolation yield | 0.9  |  |
|--------------------------------------------------------|-------|---|---------------------------------|------------|---------------|----------------------|----------------------|-----------------|------|--|
| Input                                                  | Kg    |   |                                 | Waste (Kg) | Reaction time | Seeding S1           | 0.061                | Seeding S2      | 0.01 |  |
| Sodium Pyruvate                                        | 12.5  |   | Initial reaction at 15 °C, pH 8 |            | 2             | Stream 1-1           | Weight               | mol             |      |  |
| Water                                                  | 739   | → |                                 |            |               |                      | NaCl                 | 37.24           | 637  |  |
| NH <sub>4</sub> Cl                                     | 41.4  |   |                                 |            |               |                      | Na <sub>2</sub> EDTA | 2.49            |      |  |
| Sodium EDTA                                            | 2.5   |   |                                 |            |               |                      | TPL (cell)           | 75.00           |      |  |
| TPL (Steam 1-7)                                        | 75.00 |   |                                 |            |               |                      | NaHSO <sub>3</sub>   | 1.68            |      |  |
| NaHSO <sub>3</sub>                                     | 1.68  |   |                                 |            |               |                      | NH <sub>4</sub> Cl   | 7.40            | 138  |  |
| Catechol                                               | 8.30  |   |                                 |            |               |                      | Sodium pyruvate      | 4.20            | 38   |  |
|                                                        |       |   |                                 |            | L-Dopa        | 12.54                | 64                   |                 |      |  |
| L-Dopa seed                                            | 7.65  | → | Initial reaction at 15 °C, pH 8 |            |               | (water by product)   | 11.47                | 637             |      |  |
|                                                        |       |   |                                 |            |               | (solvent water)      | 1010                 |                 |      |  |
|                                                        |       |   |                                 |            |               | (Water in wet solid) | 51.32                |                 |      |  |
|                                                        |       |   |                                 |            |               | total water          | 970                  |                 |      |  |
| sodium pyruvate                                        | 61.76 |   | Initial reaction at 15 °C, pH 8 |            | 15            | (L-Dopa active)      | 119.75               | 608             |      |  |
| catechol                                               | 61.76 | → |                                 |            |               |                      |                      |                 |      |  |
| water                                                  | 271   |   |                                 |            |               |                      |                      |                 |      |  |
|                                                        |       |   |                                 |            |               |                      |                      |                 |      |  |
|                                                        |       |   | Centrifuge                      | → 1-1      |               |                      |                      |                 |      |  |
|                                                        |       |   |                                 |            |               | 1111                 |                      |                 |      |  |



| Ajinomoto Process Step 1-1 Biocatalyst Production |       |   |                                  |     |                 |               | yield             | 0.9         |      |
|---------------------------------------------------|-------|---|----------------------------------|-----|-----------------|---------------|-------------------|-------------|------|
| Input                                             | Kg    |   |                                  |     | Waste (Kg)      | Reaction time |                   |             |      |
| SM-B                                              | 0.054 | → | First stage seed, 37 °C          |     |                 |               | Stream 1-5 +1-6   | Weight (kg) |      |
|                                                   |       |   |                                  |     |                 |               |                   | Waste media | 550  |
|                                                   |       |   |                                  |     |                 |               |                   | buffer      | 1449 |
| SM-B                                              | 27    | → | Second stage seed, 37 °C         |     |                 |               | Total             | 1999        |      |
|                                                   |       |   |                                  |     |                 |               |                   |             |      |
| SM-B                                              | 448.5 | → | High density fermentation, 37 °C |     |                 |               |                   |             |      |
| Feed medium                                       | 84.6  |   |                                  |     |                 |               |                   |             |      |
| IPTG                                              | 0.024 |   |                                  |     |                 |               |                   |             |      |
| 29% NH <sub>4</sub> OH                            | 12    |   |                                  |     |                 |               |                   |             |      |
| Water                                             | 1500  |   | Dia-filtration                   |     |                 |               |                   |             |      |
| Na <sub>2</sub> HPO <sub>4</sub>                  | 1.87  | → |                                  |     | 1-5             |               | Combined with 1-6 |             |      |
| NaH <sub>2</sub> PO <sub>4</sub>                  | 0.075 |   |                                  |     |                 |               |                   |             |      |
|                                                   |       |   |                                  |     |                 |               |                   |             |      |
|                                                   |       |   | disc centrifuge                  |     |                 |               |                   |             |      |
| Fermentation input                                | 572   |   |                                  |     | 1-6             |               | Combined with 1-5 |             |      |
| Purification input                                | 1501  |   |                                  |     |                 |               |                   |             |      |
|                                                   |       |   |                                  |     |                 |               |                   |             |      |
|                                                   |       |   | TPL in wet cell                  | 1-7 | Estimated waste |               |                   |             |      |
| Total input                                       | 2074  |   | 75                               |     | 1999            |               |                   |             |      |

## Waste stream inventory for L-Dopa manufacture processes

The waste streams are created in Process Flow Diagram. The mass of the components are expressed in E factor. Each stream is also characterized by its components in percentage.

The waste streams are evaluated in terms of quantity, composition, and hazardous concerns.

For waste streams, the management, treatment, and discharge are regulated by Clean Air Act (40CFR Part63, Subpart GGG)<sup>2</sup> and Clean Water Act (40CFR Part 439 Pharmaceutical Manufacture Point Source Category; 40CFR Part 122, National Pollutant Discharge Elimination System Permit Program; 40CFR Part 403, National Pretreatment Program).<sup>3</sup> Since hazardous wastes need to be managed and treated separately, the streams are examined for hazardous waste as defined and characterized by regulations in Resource Conservation and Recovery Act (RCRA).<sup>1</sup> Waste components with regulatory concerns are highlighted in the inventory.

Technical options for waste treatment, for specific streams are guided by the framework in the survey reports by US Environmental Protection Agency (EPA).<sup>4,5</sup>

### Waste stream inventory

#### The Ajinomoto process

| <b>Ajinomoto 1-1</b>      | E      | %     | CAA | CWA | RCRA |
|---------------------------|--------|-------|-----|-----|------|
| NaCl                      | 0.37   | 3.6   |     |     |      |
| Na <sub>2</sub> EDTA      | 0.02   | 0.19  |     |     |      |
| TPL (cell)                | (0.75) |       |     |     |      |
| NaHSO <sub>3</sub>        | 0.02   | 0.19  |     |     |      |
| NH <sub>4</sub> Cl        | 0.07   | 0.67  |     |     |      |
| Sodium pyruvate           | 0.04   | 0.38  |     |     |      |
| L-Dopa                    | 0.13   | 1.3   |     |     |      |
| total water               | 9.70   | 93.7  |     |     |      |
| Total                     | 10.35  | 100   |     |     |      |
| <b>Ajinomoto 1-2</b>      |        |       |     |     |      |
| Activated carbon          | 0.06   | 100   |     |     |      |
| <b>Ajinomoto 1-3</b>      |        |       |     |     |      |
| NaCl                      | 0.40   | 5.2   |     |     |      |
| water                     | 7.12   | 93.2  |     |     |      |
| L-Dopa                    | 0.12   | 1.6   |     |     |      |
| Total                     | 7.63   | 100   |     |     |      |
| <b>Ajinomoto 1-5+ 1-6</b> |        |       |     |     |      |
| Waste media               | 5.50   | 27.5  |     |     |      |
| 5 mM phosphate            | 14.49  | 72.5  |     |     |      |
| Total                     | 19.98  | 100.0 |     |     |      |

## The Monsanto Process

|                                                         | E     | %      | CAA | CWA | RCRA  |
|---------------------------------------------------------|-------|--------|-----|-----|-------|
| <b>Monsanto 1-1</b>                                     |       |        |     |     |       |
| NaOAc                                                   | 0.22  | 5.66   |     |     |       |
| Water                                                   | 0.06  | 1.57   |     |     |       |
| AcOH                                                    | 3.63  | 92.77  |     |     |       |
| Total                                                   | 3.91  | 100.00 |     |     |       |
| <b>Monsanto 1-2</b>                                     |       |        |     |     |       |
| AcOH                                                    | 2.15  | 70.09  |     |     |       |
| Unisolated <b>12</b>                                    | 0.92  | 29.92  |     |     |       |
| Total                                                   | 3.07  | 100.00 |     |     |       |
| <b>Monsanto 2-1</b>                                     |       |        |     |     |       |
| Acetone                                                 | 6.12  | 100    |     | √   | √F003 |
| <b>Monsanto 2-2</b>                                     |       |        |     |     |       |
| Water                                                   | 1.91  | 94.92  |     |     |       |
| Un-isolated <b>13</b>                                   | 0.10  | 5.08   |     |     |       |
| Total                                                   | 2.01  | 100.00 |     |     |       |
| <b>Monsanto 3-1</b>                                     |       |        |     |     |       |
| iPrOH                                                   | 9.87  | 88.00  |     | √   |       |
| Water                                                   | 1.35  | 12.00  |     |     |       |
| Total                                                   | 11.22 | 100.00 |     |     |       |
| <b>Monsanto 3-2</b>                                     |       |        |     |     |       |
| NaCl                                                    | 0.56  | 9.05   |     |     |       |
| Catalyst <b>14</b>                                      | 0.00  | 0.00   |     |     |       |
| Water                                                   | 1.52  | 24.64  |     |     |       |
| iPrOH                                                   | 3.89  | 62.94  |     | √   |       |
| Un-isolated <b>15</b>                                   | 0.21  | 3.37   |     |     |       |
| Total                                                   | 6.18  | 100.00 |     |     |       |
| <b>Monsanto 4-1</b>                                     |       |        |     |     |       |
| MeBr                                                    | 0.60  | 100    | √   |     |       |
| <b>Monsanto 4-2</b>                                     |       |        |     |     |       |
| NaBr                                                    | 2.56  | 31.26  |     |     |       |
| AcOH                                                    | 0.76  | 9.33   |     |     |       |
| Water                                                   | 4.86  | 59.41  |     |     |       |
| Total                                                   | 8.18  | 100.00 |     |     |       |
| <b>Monsanto 4-3</b>                                     |       |        |     |     |       |
| Water                                                   | 1.89  | 88.33  |     |     |       |
| Un-isolated <b>1</b>                                    | 0.25  | 11.67  |     |     |       |
| Total                                                   | 2.14  | 100.00 |     |     |       |
| <b>Monsanto 4-5</b>                                     |       |        |     | √*  |       |
| MeNH(CH <sub>2</sub> ) <sub>2</sub> OH HBr              | 0.89  | 1.48   |     |     |       |
| Me <sub>2</sub> N(CH <sub>2</sub> ) <sub>2</sub> OH HBr | 0.11  | 0.18   |     |     |       |
| Ethanolamine                                            | 10.08 | 16.71  |     |     |       |
| Water                                                   | 49.23 | 81.63  |     |     |       |
| Total                                                   | 60.30 | 100.00 |     |     |       |

\* Total ammonia as N regulated by CWA



## The Roche Process

|                        | E     | %      | CAA | CWA | RCRA |
|------------------------|-------|--------|-----|-----|------|
| <b>Roche 1-1</b>       |       |        |     |     |      |
| Acetic acid            | 8.51  | 16.9   |     |     |      |
| Sodium acetate         | 3.98  | 7.9    |     |     |      |
| DMF                    | 1.25  | 2.5    |     |     |      |
| Water                  | 36.96 | 72.9   |     |     |      |
| Total                  | 50.7  | 100.00 |     |     |      |
| <b>Roche 1-2</b>       |       |        |     |     |      |
| Water                  | 43.2  | 96.0   |     |     |      |
| Un-isolated <b>8</b>   | 1.78  | 4.0    |     |     |      |
| Total                  | 45.0  | 100    |     |     |      |
| <b>Roche 2-1</b>       |       |        |     |     |      |
| Raney Ni               | 1.8   | 100    |     |     |      |
| <b>Roche 2-2</b>       |       |        |     |     |      |
| NaOAc                  | 1.74  | 0.9    |     |     |      |
| NaCl                   | 8.07  | 4.0    |     |     |      |
| HCl                    | 0.77  | 0.4    |     |     |      |
| Water                  | 193   | 94.8   |     |     |      |
| Total                  | 203.6 | 100    |     |     |      |
| <b>Roche 2-3</b>       |       |        |     |     |      |
| MeOH                   | 8.1   | 18     | √   | √   |      |
| Water                  | 34.9  | 77.8   |     |     |      |
| Un-isolated <b>9</b>   | 1.9   | 4.2    |     |     |      |
| Total                  | 44.9  | 100    |     |     |      |
| <b>Roche 3-1</b>       |       |        |     |     |      |
| ( <i>R</i> )- <b>9</b> | 2.64  | 8.25   |     |     |      |
| Compound <b>10</b>     | 0.21  | 0.64   |     |     |      |
| NaOH                   | 0.30  | 0.95   |     |     |      |
| MeOH                   | 17.42 | 54.43  | √   | √   |      |
| Water                  | 11.43 | 35.72  |     |     |      |
| Total                  | 32.00 | 100.00 |     |     |      |

Roche - continued

| Roche 4-1                                               | E     | %      | CAA | CWA | RCRA   |
|---------------------------------------------------------|-------|--------|-----|-----|--------|
| MeBr                                                    | 0.65  | 100    | √   |     |        |
| <b>Roche 4-2</b>                                        |       |        |     |     |        |
| Toluene                                                 | 12.45 | 93.70  | √   | √   | √ F005 |
| Benzoic acid                                            | 0.84  | 6.30   |     |     |        |
| Total                                                   | 13.3  | 100.00 |     |     |        |
| <b>Roche 4-3</b>                                        |       |        |     | √*  |        |
| NH <sub>4</sub> Br                                      | 4.53  | 30.97  |     |     |        |
| Water                                                   | 10.09 | 69.03  |     |     |        |
| Total                                                   | 14.6  | 100.00 |     |     |        |
| <b>Roche 4-4</b>                                        |       |        |     |     |        |
| Activated carbon                                        | 0.2   | 100    |     |     |        |
| <b>Roche 4-5</b>                                        |       |        |     | √*  |        |
| NH <sub>4</sub> Br                                      | 1.14  | 8.01   |     |     |        |
| Water                                                   | 10.76 | 75.79  |     |     |        |
| Compound 10                                             | 1.96  | 13.77  |     |     |        |
| Un-isolated 1                                           | 0.35  | 2.44   |     |     |        |
| Total                                                   | 14.2  | 100.00 |     |     |        |
| <b>Roche 4-7</b>                                        |       |        |     | √*  |        |
| MeNH(CH <sub>2</sub> ) <sub>2</sub> OH HBr              | 0.97  | 1.49   |     |     |        |
| Me <sub>2</sub> N(CH <sub>2</sub> ) <sub>2</sub> OH HBr | 0.11  | 0.17   |     |     |        |
| Water                                                   | 53.12 | 81.61  |     |     |        |
| NH <sub>2</sub> (CH <sub>2</sub> ) <sub>2</sub> OH      | 10.89 | 16.74  |     |     |        |
| Total Waste                                             | 65.1  | 100.00 |     |     |        |

\* Total ammonia as N regulated by CWA

**Waste inventory summary**

| Process                               | Ajinomoto | Monsanto      | Roche          |
|---------------------------------------|-----------|---------------|----------------|
| Total E factor                        | 39        | 103           | 485.4          |
| Total number of waste streams         | 4         | 10            | 12             |
| Gas waste stream                      | 0         | 1             | 1              |
| Solid waste stream                    | 1         | 0             | 2              |
| Solvent-free aqueous stream           | 3         | 2             | 3              |
| Waste solvent or organic-laden stream | 0         | 7             | 6              |
| Hazardous waste based on RCRA         | 0         | 1             | 1              |
| E factor of hazardous waste           | 0         | 6.1 (acetone) | 12.5 (Toluene) |
| Hazardous Gas (MeBr)                  | 0         | 1             | 1              |
| E factor for MeBr                     | 0         | 0.6           | 0.65           |

## Reference

1. Hazardous Waste Regulations, US EPA. Accessed on 03Dec2013  
<http://www.epa.gov/osw/laws-regs/regs-haz.htm>
2. Compliance Assistance Tool for Clean Air Act Regulations: Subpart GGG of 40 CFR NESHAPS for Source Category Pharmaceutical Production. US EPA. 2002.  
<http://www.epa.gov/compliance/resources/publications/assistance/sectors/caapharma.pdf>  
Accessed on 03Dec2013
3. (a) Permit Guidance Document: Pharmaceutical Manufacturing Point Source Category (40 CFR Part 439), US EPA, 2006.  
[http://water.epa.gov/scitech/wastetech/guide/pharm/upload/2006\\_03\\_27\\_guide\\_pharm\\_guidance\\_pharmaceuticals-guidance.pdf](http://water.epa.gov/scitech/wastetech/guide/pharm/upload/2006_03_27_guide_pharm_guidance_pharmaceuticals-guidance.pdf)  
Accessed on 03Dec2013  
(b) National Pollutant Discharge Elimination System (NPDES) for Pharmaceutical manufacture industry website:  
<http://water.epa.gov/scitech/wastetech/guide/pharm/index.cfm>  
Accessed on 03Dec2013  
(c) Introduction to National Pretreatment Program, US EPA, 2011  
[http://www.epa.gov/npdes/pubs/pretreatment\\_program\\_intro\\_2011.pdf](http://www.epa.gov/npdes/pubs/pretreatment_program_intro_2011.pdf)  
Accessed on 03Dec2013
4. U.S. Environmental Protection Agency, *Pharmaceutical Waste, Hazardous Waste Generation, Treatment, and Disposal*, 1976,  
Downloadable from National Service Center for Environmental Publications (NSCEP) website:  
<http://www.epa.gov/nscep/index.html>, Accessed on 31Oct2013
5. E. J. Struzeski, *Waste Treatment and Disposal Methods for the Pharmaceutical Industry*, National Field Investigations Center, US EPA, Denver, Colorado, USA, March
